1 **RESOURCE ARTICLE**

2

3

4 **Single cell analysis of lymphatic endothelial cell fate specification and**  
5 **differentiation during zebrafish development**

6

7 Lin Grimm<sup>1,2,3,\*</sup>, Elizabeth Mason<sup>1,2\*,#</sup>, Oliver Yu<sup>1,2</sup>, Stefanie Dudczig<sup>1,2</sup>, Virginia Panara<sup>4</sup>, Tyrone  
8 Chen<sup>1,2</sup>, Neil I. Bower<sup>3</sup>, Scott Paterson<sup>1,2,3</sup>, Kazuhide Okuda<sup>1,2</sup>, Maria Rondon Galeano<sup>1,2</sup>, Sakurako  
9 Kobayashi<sup>1,2</sup>, Anne Senabouth<sup>3,5</sup>, Anne K. Lagendijk<sup>3</sup>, Joseph Powell<sup>3,5,6,7</sup>, Kelly A. Smith<sup>8</sup>, Katarzyna  
10 Koltowska<sup>4</sup> and Benjamin M. Hogan<sup>1,2,3,8#</sup>.

11

12 <sup>1</sup> Organogenesis and Cancer Program, Peter MacCallum Cancer Centre, Melbourne, VIC 3000, Australia.

13 <sup>2</sup> Sir Peter MacCallum Department of Oncology, University of Melbourne, Melbourne, VIC 3000, Australia.

14 <sup>3</sup> Division of Genomics of Development and Disease, Institute for Molecular Bioscience, The University of  
15 Queensland, St Lucia, Brisbane, Queensland 4072, Australia.

16 <sup>4</sup> Department of Immunology, Genetics and Pathology, Uppsala University, Uppsala, Sweden.

17 <sup>5</sup> Garvan Institute of Medical Research, 384 Victoria Street, Darlinghurst, Sydney, 2010, Australia.

18 <sup>6</sup> School of Medical Sciences, 18 High Street, University of New South Wales, Kensington, Sydney, Australia.

19 <sup>7</sup> Garvan-Weizmann Centre for Cellular Genomics, Garvan Institute of Medical Research, 384 Victoria Street,  
20 Darlinghurst, Sydney, 2010, Australia.

21 <sup>8</sup> Department of Anatomy and Physiology, University of Melbourne, Melbourne, VIC 3000, Australia.

22

23

24

25 *# Authors for Correspondence:*

26

27 Professor Ben Hogan

28 Organogenesis and Cancer Program,

29 Peter MacCallum Cancer Centre,

30 Melbourne, VIC 3000, Australia

31 E-mail: [ben.hogan@petermac.org](mailto:ben.hogan@petermac.org)

32

33 Dr Elizabeth Mason (computational biology lead)

34 Organogenesis and Cancer Program,

35 Peter MacCallum Cancer Centre,

36 Melbourne, VIC 3000, Australia

37 E-mail: [elizabeth.mason@petermac.org](mailto:elizabeth.mason@petermac.org)

38

39

40

41 **Keywords:** Lymphatics, Lymphangiogenesis, Prox1, Single cell, RNA Seq, ATAC seq.

42 **Summary:** 181 words

43 **Main Text:** 4,700 words

44

45 **During development, the lymphatic vasculature forms as a second, new vascular network**  
46 **derived from blood vessels. The transdifferentiation of embryonic venous endothelial cells**  
47 **(VECs) into lymphatic endothelial cells (LECs) is the first step in this process. Specification,**  
48 **differentiation and maintenance of LEC fate are all driven by the transcription factor Prox1,**  
49 **yet downstream mechanisms remain to be elucidated. We present a single cell**  
50 **transcriptomic atlas of lymphangiogenesis in zebrafish revealing new markers and**  
51 **hallmarks of LEC differentiation over four developmental stages. We further profile single**  
52 **cell transcriptomic and chromatin accessibility changes in zygotic *prox1a* mutants that are**  
53 **undergoing a VEC-LEC fate reversion during differentiation. Using maternal and zygotic**  
54 ***prox1a/prox1b* mutants, we determine the earliest transcriptomic changes directed by**  
55 **Prox1 during LEC specification. This work altogether reveals new transcriptional targets and**  
56 **regulatory regions of the genome downstream of Prox1 in LEC maintenance, as well as**  
57 **showing that Prox1 specifies LEC fate primarily by limiting blood vascular and**  
58 **hematopoietic fate. This extensive single cell resource provides new mechanistic insights**  
59 **into the enigmatic role of Prox1 and the control of LEC differentiation in development.**

60

61

## 62 **Introduction**

63 Lymphatic vasculature plays crucial physiological roles that include the drainage of interstitial  
64 fluids, trafficking of immune cells and drainage of dietary lipids. The formation of new  
65 lymphatic vessels from pre-existing vessels (lymphangiogenesis) occurs in both development  
66 and disease. Signalling through Vegfr3 (Flt4) can be triggered by Vegfc or Vegfd and drives  
67 lymphangiogenesis in settings as diverse as development, cancer metastasis, inflammation  
68 and ocular disease <sup>1</sup>. In the embryo, lymphangiogenesis begins when the first LEC progenitors  
69 depart the cardinal veins (CVs) from E9.5 in mice and 32 hours post fertilisation (hpf) in  
70 zebrafish <sup>2</sup>. Vegfc-Flt4 signalling drives LEC progenitor sprouting but also up-regulates Prox1  
71 expression in both zebrafish and mice <sup>3-7</sup>. The transcription factor (TF) Prox1 acts as the  
72 master regulator of LEC fate <sup>8</sup> and is exclusively expressed in developing LECs in early  
73 embryonic vasculature. Loss of Prox1 (*Prox1a* and *Prox1b* in zebrafish) leads to a loss of  
74 developing lymphatic vessels <sup>4,9</sup>. Following departure from the CV, LEC progenitors go on to  
75 colonise embryonic tissues and organs and remodel to form functional lymphatic vessels <sup>10</sup>.  
76 While at later stages in mammals there are contributions of LECs from non-venous origins,

77 early embryonic lymphangiogenesis occurs chiefly from the CVs<sup>11-17</sup>. In mice, both the earliest  
78 stages of LEC progenitor sprouting from CVs and maintenance of LEC fate in stable lymphatics  
79 are dependent on the function of Prox1<sup>9,18</sup>.

80

81 Despite over two decades of study of this enigmatic developmental process, the  
82 transcriptomic changes that occur as embryonic venous endothelial cells (VECs)  
83 transdifferentiate into LEC progenitors, and further differentiate into mature lymphatics,  
84 have not been transcriptionally profiled *in vivo*. In the absence of Prox1 in conditional  
85 knockout mice, LECs have been shown to lose the expression of some LEC markers and to gain  
86 expression of some blood vascular endothelial cell (BEC) markers<sup>18</sup>. Prox1 is known to  
87 autoregulate its own expression and to also regulate Flt4 expression in a positive regulatory  
88 loop during early development<sup>7</sup>. Yet how Prox1 controls the transcriptome during LEC  
89 specification, differentiation and maintenance has not been described in detail. This is in part  
90 because of the technical challenge of accessing early mouse endothelial cells (ECs) in wildtype  
91 and mutant embryos, a problem that is not limiting when using the zebrafish embryo.

92

93 As recent studies have demonstrated highly conserved expression and function of Prox1  
94 homologues in zebrafish<sup>4,6,19,20</sup>, we here took advantage of the accessibility of the zebrafish  
95 embryo to examine developmental lymphangiogenesis using single cell transcriptomics. We  
96 provide a resource of new markers of VEC-LEC transdifferentiation, differentiating and  
97 mature cell types and validate several new markers with transgenic approaches. We analysed  
98 zebrafish zygotic *prox1a* mutants with single cell RNA sequencing and single cell ATAC  
99 sequencing. This identified a VEC-LEC fate reversion in the absence of zygotic Prox1a, defined  
100 key Prox1-dependent genes in fate maintenance and discovered regulatory regions of  
101 chromatin (enhancers) controlled by Prox1. Finally, profiling maternal-zygotic double  
102 *prox1a/prox1b* (null) mutant vasculature with single cell RNA sequencing revealed that Prox1  
103 reduces gene expression in early LEC progenitors, including for a core network of conserved  
104 haematopoietic and blood vascular fate regulators. Overall, this single cell resource reveals  
105 embryonic lymphangiogenesis with Prox1-dependent mechanisms central in specification,  
106 differentiation and maintenance of LEC fate.

107

108

## 109 Results

### 110 A single cell RNA-seq atlas of embryonic lymphangiogenesis

111 Zebrafish secondary angiogenesis occurs when Prox1-positive LECs and VECs both sprout  
112 from the cardinal vein (CV) in the trunk or the head in a progressive process between ~32 and  
113 ~48hpf. In the trunk, sprouting LECs migrate dorsally and invest the horizontal myoseptum,  
114 where they form a transient pool of parachordal LECs (PLs) from approximately 48hpf<sup>21,22</sup>. In  
115 craniofacial regions of the embryo, LECs sprout from the CVs at several locations<sup>23,24</sup>. After  
116 this, LECs throughout the embryo proliferate and migrate extensively (between ~56hpf-  
117 80hpf) to colonise new regions and tissues<sup>24-27</sup>. In the trunk, LECs anastomose to form the  
118 first lymphatic vessels at around 4 days post fertilisation; forming the thoracic duct (TD),  
119 dorsal longitudinal lymphatic vessels (DLLVs) and intersegmental lymphatic vessels (ISLVs). In  
120 craniofacial regions, they assemble from disparate sources into lateral (LFL), medial (MFL),  
121 otolithic lymphatic vessels (OLV) and lymphatic branchial arches (LBA), as well as forming a  
122 lymphatic loop (LL) in the head that will later give rise to a unique mural LEC population in the  
123 brain (muLECs, also known as FGPs or brain LECs)<sup>28-30</sup>. By 5dpf, major lymphatics in the  
124 craniofacial and trunk regions of the embryo are functional and drain dyes and fluids  
125 deposited in the peripheral tissues<sup>22,31</sup>.

126

127 To profile stages of development spanning key steps in lymphatic differentiation, we selected:  
128 40hpf, when specification and initial sprouting of LECs are occurring; 3dpf, when immature  
129 LECs are migrating through the embryo; 4dpf when LECs are assembling into vessels; and 5dpf  
130 when lymphatics are functional and maturing<sup>32</sup> (**Fig 1a**). We used transgenic zebrafish strains  
131 that specifically labelled embryonic vasculature to allow for fluorescence activated cell sorting  
132 (FACS, full details in methods). We dissociated whole transgenic embryos and FAC sorted ECs,  
133 for profiling on the 10X Chromium scRNA-seq platform. We sequenced 35,634 cells across 3  
134 runs, then merged and normalised the data<sup>33,34</sup>, filtering low-quality libraries (**Extended data**  
135 **Fig 1a**, full details in methods). To define the cellular identity of each cluster, we  
136 systematically evaluated the expression of known markers summarised in **Extended data**  
137 **Table 1a**. We identified 9,771 lymphatic and venous ECs that comprise our single cell atlas of  
138 lymphangiogenesis, which is accessible in an interactive CellXGene explorer web app at the  
139 link <http://115.146.95.206:5006/> (**Fig 1b**, **Extended data Fig 1b-c**).

140

141 This dataset is displayed<sup>35</sup> as a UMAP in **Fig 1b** coloured according to developmental stage  
142 and cell phenotype, with venous (VEC) to lymphatic (LEC) trajectory of differentiation  
143 confirmed by RNA-velocity analysis<sup>36</sup>. Comparison of cells at 40hpf with later stages revealed  
144 that the earlier populations are transcriptionally distinct from VECs and LECs at 3, 4 and 5dpf.  
145 Notably, the 40hpf “VEC preLEC” cluster contained both *prox1a+* and *prox1a-* cells forming a  
146 single population rather than discrete clusters. This indicates that LECs are not  
147 transcriptionally distinct from VECs at 40hpf, suggesting that while early *prox1a+* cells are  
148 specified they have not yet differentiated (**Fig 1c**)<sup>4</sup>. We identified 3 main classes of LECs at 3,  
149 4 and 5dpf: muLECs (1,511 cells) marked by expression of *osr2*<sup>28</sup>, canonical LECs marked by  
150 expression of *cdh6* (2,669 cells), and a smaller sub-population of LECs expressing low levels  
151 of *prox1a* (LEC\_low\_prox1a, 310 cells) (**Fig 1c, Extended data Fig 1d-e**). To define markers of  
152 differentiating canonical LECs at each developmental stages, we applied differential  
153 expression (DE) analysis (**Extended data Table 1b**,). This analysis not only captured known  
154 LEC markers including *prox1a*, *angpt2a*, *tbx1* and *cldn11b*, but also uncovered new genes  
155 commonly expressed in canonical LECs across all developmental stages including *grp156*,  
156 *hapln3*, *cdh6* and *tspan18a* (**Fig 1d, Extended data Fig 1f**). We extended this approach and  
157 evaluated global differences between all canonical LECs and all VECs (n=1,240 genes,  
158 **Extended data Table 1c**). GO analysis<sup>37</sup> confirmed the association of biological processes  
159 known to be associated with lymphatics with genes upregulated in LEC (n=752 LEC gene set),  
160 these terms included “lymphangiogenesis”, “glycolytic process”, “lymph vessel development”  
161 and “ameboidal-type cell migration” (**Fig 1e, Extended data Table 1d**).

162 To provide further confidence in the specificity of the new LEC markers defined by this scRNA-  
163 seq resource, we used DE analysis to define cluster specific gene expression. We noted that  
164 this analysis suggested higher expression of the well-known marker *lyve1b* in muLECs than in  
165 LECs, which we validated by examining expression levels of *lyve1b* using the established  
166 transgenic line *Tg(lyve1b:DsRed2)* (heat map in **Fig 2a**). We further identified expression of  
167 the known kidney epithelial solute transporter *slc7a7* as uniquely expressed in muLEC cells  
168 and *fabp11a* as a canonical LEC and VEC marker excluded from muLECs. We generated both  
169 new *slc7a7a*-Citrine and a *fabp11a*-Citrine BAC transgenic strains, which confirmed the  
170 muLEC and vascular expression patterns and further validated our scSeq atlas (**Fig 2b-c**).  
171 Overall, this atlas therefore identifies n=752 specific markers of lymphangiogenesis, the

172 majority of which are new markers (**Extended data Table 1c**), representing new candidate  
173 regulators and spanning four developmental stages.

174

175 **Prox1 maintains LEC identity by repressing blood vascular fate and promoting lymphatic**  
176 **vascular fate at the level of the transcriptome**

177 Prox1 is both necessary and sufficient to drive VEC to LEC trans-differentiation in mammals  
178 and this is proposed to occur by Prox1 simultaneously initiating LEC fate and repressing the  
179 VEC fate program<sup>8,18</sup>. Prox1 expression is also necessary for the maintenance of LEC identity  
180 during development<sup>18,38,39</sup>. Despite the role for Prox1 being well-studied in mouse models,  
181 the transcriptomic program controlled by Prox1 *in vivo* has never been profiled. Zebrafish  
182 *prox1a* zygotic and maternal zygotic mutants have been previously described<sup>4,20</sup>. The zygotic  
183 mutants retain maternal deposition of *prox1a* in the oocyte, sufficient to drive normal PL  
184 formation, LEC migration to the horizontal myoseptum (HM) and initial assembly of  
185 lymphatics by 4dpf<sup>4,19</sup>, however mutants have a reduction in total LEC numbers throughout  
186 the face and trunk<sup>4</sup>. When the maternal contribution of *prox1a* is removed, lymphatic  
187 development is more severely impaired<sup>4</sup>. We hypothesised that the zygotic mutants which  
188 form lymphatic vessels, likely have abnormal vessel identity in the absence of zygotic Prox1.  
189 Thus, we applied scRNA-seq to ECs FAC sorted from *Zprox1a*<sup>-/-</sup> mutants<sup>20</sup> and WT sibling  
190 zebrafish at 4dpf, during lymphatic vessel assembly (n=8,075 cells, **Extended data Fig 2a**,  
191 **Extended data Table 2a**). Cluster analysis revealed 3 populations of LECs (n=2,068) and a  
192 single population of VECs (n=1,051) comprising both mutant and wild type cells, and perhaps  
193 most striking, a single population of mutant cells (n=484) transcriptionally similar to VECs,  
194 marked by the expression of *aqp1a.1* (**Fig 3a-d**, **Extended data Figs 2b-e**). All three LEC  
195 clusters (LEC, LEC\_S1, LEC\_S2) showed graded expression of lymphatic markers *prox1a*,  
196 *cldn11b*, *cdh6* and *angpt2a*, such that “LEC” most closely resembles canonical LECs from our  
197 WT atlas. LEC\_S1 and S2 represent alternative LEC sub-types with different proliferative  
198 potential based on S-phase occupancy and cell cycle marker *mki67* (**Fig 3b,e**, **Extended data**  
199 **Fig 2e**). The expression of *prox1a* was lowest in the more proliferative LEC\_S1 cells, and  
200 highest in the less proliferative LEC\_S2 (**Fig 3b,e**). RNA-velocity analysis suggested a  
201 trajectory between the mutant cluster and the LEC cluster (**Fig 3c** lower). Taken together,

202 these findings suggest that the mutant specific cluster sits on a trajectory between LEC and  
203 VEC fate, representing cells either failing to fully differentiate from VEC to LEC or LECs  
204 undergoing dedifferentiation and fate reversion.

205

206 To survey how Prox1 maintains normal LEC differentiation, we performed DE analysis  
207 comparing the mutant cluster with WT LEC (**Fig 3f, Extended data Table 2b**). Overall, a much  
208 larger set of genes were downregulated than upregulated in the mutant cluster (n=1,034 vs  
209 n=294) with almost half of the most downregulated genes (AvLogFC) highly enriched for LEC  
210 markers (eg. *tbx1*, *cdh6*, *cldn11b*). Of the upregulated genes, almost 75% were VEC markers  
211 (eg. *sox7*, *kdrl*, *cdh5*) and again this was enriched in the most highly upregulated genes (**Fig**  
212 **3f, Extended data Fig 2f**). Comparing the change in gene expression between the wildtype  
213 LEC cluster and VEC cluster, with the change between wildtype LEC and mutant cluster, we  
214 found striking concordance suggesting the mutant cluster is shifted along a LEC fate to VEC  
215 fate trajectory (**Fig 3g**). Overall, there is a simultaneous loss of lymphatic fate and re-  
216 acquisition of blood vascular gene expression, consistent with work in mouse and with Prox1  
217 function being highly conserved between vertebrates. To validate these observations, we  
218 used confocal imaging of *Zprox1a*<sup>-/-</sup> mutants and observed upregulation of blood vascular  
219 markers *cdh5* (**Fig 3h-i, Extended data Fig 3a,c**) and *kdrl* (**Fig 3j-k, Extended data Fig 3d-g**) in  
220 *lyve1b*-positive lymphatics vessels. We saw a coincident reduction in the expression of *lyve1b*  
221 in these vessels (**Extended data Fig3b**). Interestingly, the difference in *kdrl* levels (relative  
222 intensity) in lymphatics between mutants and wildtype was more significant at 5dpf than  
223 4dpf, suggesting that progressive dedifferentiation may be occurring in the mutant (**Fig 3k**).  
224 This single cell profile thus demonstrates that Prox1 alone is sufficient to maintain LEC fate  
225 and identifies the gene expression maintained by Prox1 during lymphatic differentiation.

226

227 **Single cell ATAC sequencing reveals chromatin accessibility signatures in LECs and VECs,**  
228 **identifying lymphatic specific enhancers and predicting key LEC TF families**

229

230 At the level of gene expression, Prox1 function is essential for VEC to LEC differentiation,  
231 however it is unknown if Prox1 controls chromatin accessibility during this process. Thus, we  
232 next profiled *Zprox1a*<sup>-/-</sup> mutants at 4dpf during vessel assembly using single nuclei (sn) ATAC-  
233 seq (n=3,731 nuclei, **Extended data Fig 4a, Extended data Table 3a**). Cluster analysis (**Fig 4a**)

234 and overall accessibility of key markers (**Fig 4b**) identified similar populations to the scRNA-  
235 seq profiling: canonical LEC (LEC\_01 n=114 nuclei, LEC\_02 n=213 nuclei) and VEC (VEC\_01  
236 n=157 nuclei) clusters, and a small but discrete population comprised almost entirely of  
237 mutant cells (Mutant Cluster n=47 nuclei). Notably, we found that there was almost no  
238 contribution of mutant cells to the LEC clusters (**Fig 4a** lower bar plot), indicating a loss of fate  
239 when cell identity is determined at the level of chromatin state (**Extended data Fig 4b**).  
240 Differential accessibility (DA) analysis revealed unique sets of peaks that mark individual VEC,  
241 LEC and AEC (arterial EC) clusters (**Fig 4c**).

242

243 To identify phenotype specific chromatin accessibility, we performed DA analysis between  
244 WT LEC and WT VEC. This revealed the more accessible regions in the LEC clusters were  
245 associated with LEC genes identified in our atlas, and the less accessible regions with VEC  
246 genes (**Fig 4d, Extended data table 3b**). DA identified n=1,561 LEC specific peaks and n=2,624  
247 VEC specific peaks representing putative lineage specific enhancers or regulatory elements  
248 (**Extended data table 3b**). To test if these regions identified enhancers, we used the zebrafish  
249 enhancer detector plasmid system (ZED vector<sup>40</sup>) and tested peaks that were uniquely open  
250 5' of the newly identified LEC marker gene *cdh6*. To exclude non-specific reporter expression,  
251 we also generated F1 embryos using a ZED vector only control. This did display mosaic  
252 neuronal and dorsal root ganglion expression **Extended data Fig 4h**, suggesting that the  
253 expression from the *cdh6* enhancer in neural structures using this vector should be taken with  
254 some caution. No vascular expression was detected. Transgenesis identified one new  
255 functional and LEC specific enhancer upstream of *cdh6*, validating the use of this dataset for  
256 enhancer discovery (**Fig. 4e-f**).

257

258 We next aimed to use this new set of putative enhancer regions in an unbiased manner to  
259 identify key TF families likely to regulate LEC development. We performed motif enrichment  
260 analysis using HOMER<sup>41</sup> for all LEC enriched DA peaks identifying n=64 TF family motifs  
261 (**Extended data table 3c**). Notably, we found motifs for TCF, ETS, SCL (TAL1), NFAT, TBX, MAF,  
262 SLUG and RBPJ family TFs to be enriched in peaks more accessible in LECs (**Fig. 4g**). Analysis  
263 of the human homologues in ENCODE data<sup>42</sup> revealed these TFs regulate a highly connected  
264 network of genes expressed in our LEC atlas (**Fig. 4h**). Importantly, a number of these TFs are  
265 already known to play important roles in lymphatics (e.g. NFAT<sup>43,44</sup>, MAFB<sup>45,46</sup>, TBX1<sup>47</sup>,



266 TCF<sup>48,49</sup>), supporting the prediction that members of these TF families will play important  
267 function roles in LEC development.

268

### 269 **Prox1 reduces the accessibility of chromatin peaks associated with blood vascular and** 270 **haematopoietic TF motifs**

271 Given that cells in the mutant specific cluster analysed by scRNA sequencing demonstrate loss  
272 of LEC gene expression and acquisition of VEC gene expression, we expected chromatin  
273 accessibility to change in an equally coordinated manner. However, analysis of accessibility  
274 at individual genes (gene score) for the Mutant Cluster revealed changes inconsistent with a  
275 simple fate shift (**Extended data tables 4a-b**). Some LEC specific genes (eg. *prox1a*, *cdh6* and  
276 *tbx1*) showed loss of transcription in the mutant cluster but increased chromatin accessibility,  
277 and some specific VEC genes with increased transcription in the mutant cluster (eg. *cdh5*, *flt1*,  
278 *gata6*) also showed discordant chromatin changes (**Fig 5a-b, Extended data Fig 4g**). A DAP  
279 analysis revealed little concordance between regions with increased accessibility, and  
280 expression in LEC or VEC in the scSeq atlas (**Fig 5c**). We identified a subset of genes with more  
281 accessible chromatin overall in the Mutant Cluster than either WT LEC or VEC settings (**Fig**  
282 **5d**). Notably, at the level of individual peaks we found that n=1,726 peaks displayed a striking  
283 increase in accessibility in the mutant cluster compared with WT LEC and n=1,794 peaks an  
284 increase compared with WT VEC (**Fig 5e, Extended data tables 4a-b**). Of these, 431 were  
285 common peaks identifying more accessible chromatin regions in the mutant cluster than in  
286 either WT LEC or WT VEC (**Fig 5e, examples in Fig. 5f**). This suggests that some regions of  
287 chromatin open up more than usual during LEC or VEC differentiation in the absence of Prox1.

288

289 To investigate the nature of the peaks that were opening in the absence of Prox1, we used an  
290 unbiased assessment of TF motifs within these regions. The more open regions were highly  
291 enriched for motifs of early acting TFs involved in embryonic vasculogenesis and  
292 haematopoiesis, including Erg, Etv2, Etv4, Ets1, Fli1 and Spi1/Pu.1 (**Fig 5g, Extended data**  
293 **table 4c**). We examined the human homologues of these TFs in ENCODE<sup>42</sup> data together with  
294 homologues of genes expressed in our atlas and identified a highly connected putative gene  
295 regulatory network (GRN) made up of early blood and blood vascular TFs (including ETV2,  
296 TAL1, SOX7, SOX17 ERG and other key fate regulators) driving target genes including each  
297 other, FOS, JUN, MYC and STAT3 (**Fig. 5h**). We take this to suggest that in the absence of

298 Prox1, TFs that are part of a GRN normally suppressed by Prox1 function are reactivated to  
299 drive blood vascular and blood fates. This demonstrates that Prox1 coordinates the correct  
300 accessibility of the chromatin and likely controls other TF functions while maintaining LEC fate  
301 in ECs. Furthermore, we note that a large number of the genes with increased chromatin  
302 accessibility are known regulators of lymphangiogenesis and so this increased accessibility  
303 may be a sensitive way to identify key regulatory genes (**Extended data table 4c**).

304

### 305 **Prox1 is required cell autonomously for the normal sprouting of lymphatic progenitors and** 306 **their contribution to the lymphatic lineage**

307 While the above data identifies the role of Prox1 at stages when it is maintaining LEC identity  
308 in assembling LECs, Prox1 is essential for the very earliest decision made when a VEC becomes  
309 specified to develop into a LEC<sup>9</sup>. To ask how Prox1 controls the earliest stages of VEC to LEC  
310 transdifferentiation, we first needed to generate a complete Prox1 loss of function model in  
311 zebrafish. We generated *prox1a*<sup>+/-</sup>, *prox1b*<sup>+/-</sup> double heterozygous animals (lacking both Prox1  
312 homologues) and then used germline transplantation approaches to produce animals  
313 carrying a double mutant germline (**Extended data Fig 5a**). Genetic crossing of these animals  
314 generated embryos that were maternal zygotic (MZ) *MZprox1a*<sup>-/-</sup>, *MZprox1b*<sup>-/-</sup> mutant  
315 zebrafish completely lacking *prox1a/b* transcript expression or maternal deposition (**Fig 6a**;  
316 **Extended data Fig 5b-c**). A quantitative phenotypic analysis revealed double MZ mutants  
317 show a severe reduction of facial lymphatics and a near complete loss of lymphatic vessels in  
318 the trunk by 4dpf (**Fig 6e, Extended data Fig 5d-g**)<sup>4</sup>. Furthermore, *MZprox1a*<sup>-/-</sup>, *MZprox1b*<sup>-/-</sup>  
319 mutants initially show a delay in the formation of PLs as these cells emigrate the CV to invest  
320 the HM, but despite this delay, these cells eventually seed the HM before failing to undertake  
321 any further migration (**Fig 6d,f**). We saw evidence for genetic interaction between *prox1a* and  
322 *prox1b* in PL formation and no change in the overall number of cells sprouting from the PCV  
323 or number of cells contributing to the venous ISVs (blood vessels) suggesting both *prox1a* and  
324 *prox1b* contribute specifically to early PL development (**Fig 6g-k**). To test whether LECs require  
325 Prox1a in a cell autonomous manner, we performed embryonic transplantation to generate  
326 chimeric embryos. Due to challenges generating and maintaining large numbers of double MZ  
327 mutant embryos, we performed transplantation of *MZprox1a*<sup>-/-</sup> mutant cells into wildtype hosts  
328 only and assessed the contributions of vascular grafts to arteries, veins and lymphatics  
329 (**Extended data Fig 6a**). *MZprox1a*<sup>-/-</sup> mutant cells efficiently contributed AECs, VECs but not

330 LECs to developing vessels in otherwise wildtype hosts at 5dpf (**Extended data Fig 6b-d**). Thus,  
331 we confirmed that Prox1 is necessary cell autonomously for zebrafish lymphatic development  
332 and that the *MZprox1a*<sup>-/-</sup>, *MZprox1b*<sup>-/-</sup> mutant phenotype is more severe than any previously  
333 described zebrafish Prox1 mutants.

334

### 335 **Prox1 functions to suppress blood and blood vascular fate during the early specification of** 336 **LEC fate in the embryo**

337 To understand the very earliest role that Prox1 plays in LEC development, we profiled the  
338 endothelium of *MZprox1a*<sup>-/-</sup>, *MZprox1b*<sup>-/-</sup> mutant zebrafish at 40hpf (when cells are both  
339 being specified to LEC fate and also actively sprouting from various regions of the PCV<sup>3,4,6</sup>)  
340 using single cell RNA seq as described above (**Extended data table 5a, Extended data Fig 7a-**  
341 **c**). Using key marker expression and DE analysis, we identified populations of cells that  
342 included VECs, endocardium, mixed populations of VECs and Prox1+ LEC progenitors (named  
343 LEC\_VEC) and clusters with expression of some VEC and AEC markers that were likely still  
344 differentiating (**Fig 7a-c, Extended data Fig 7d-h**). Based on expression of known markers and  
345 genes associated with EC sprouting (*mki67*, *pcna*), we defined two populations of secondary  
346 sprouts of venous origin (LEC VEC 01 n=713 cells, LEC VEC 02 n=677 cells) and a single  
347 population of cells representing the cardinal vein (PCV n=812 cells; **Fig 7d-e**). Consistent with  
348 our observations in **Fig 1**, cells expressing *prox1a* at 40hpf were not transcriptionally distinct  
349 from sprouting VECs and failed to form a “lymphatic progenitor” cluster, suggesting they are  
350 specified and express *prox1a* but not yet differentiated. RNA velocity analysis suggested that  
351 these three clusters remained closely related, consistent with little differentiation between  
352 these populations at this stage (**Fig 7a** right).

353

354 To identify the earliest transcriptional changes controlled by Prox1 in lymphatic development,  
355 we used DE to evaluate the global differences between *MZprox1a*<sup>-/-</sup>, *MZprox1b*<sup>-/-</sup> and WT in  
356 the LEC VEC 01, LEC VEC 02 and PCV clusters of sprouting cells (**Fig 7f, Extended data table**  
357 **5b**). We found a significant upregulation of a large set of genes in the absence of Prox1 that  
358 were identified as enriched for blood vascular and haematopoietic genes by GO-term and  
359 marker analysis (**Fig 6g-h**, n=1,137 genes, **Extended data table 5c**). We also saw increased  
360 expression of mitochondrial metabolism genes and of pre-mRNA splicing genes in the  
361 absence of Prox1 (**Fig. 7f, Extended data table 5c**). At this stage of development, in contrast

362 to the 4 dpf stage, we saw little evidence of positively regulated genes downstream of Prox1  
363 (just n=49 genes downregulated in *MZprox1a*<sup>-/-</sup>, *MZprox1b*<sup>-/-</sup>). We next examined the genes  
364 up-regulated in Prox1 mutants that we identified as key early blood and vascular  
365 developmental regulators. This includes *esm1*, *flt4*, *mef2c*, *hdac1*, *lmo2*, *lmo4*, *rasip1*, *egfl7*,  
366 *dusp5*, *clec14a*, *fli1b* and others (**Fig. 7h-i**). STRING<sup>50</sup> analysis suggested the presence of inter-  
367 related gene networks and so we further examined up-regulated TFs in this network by  
368 leveraging human homologues in ENCODE data and identifying known target genes expressed  
369 in our dataset. This identified a GRN containing SOX7, FLI1, LMO2, ETV2, TCF12, LMO4 and  
370 MAFB as well as known targets of these TFs, that is repressed in response to Prox1-function  
371 during LEC specification (**Fig. 7j**). This is highly concordant with observations at later stages of  
372 up-regulated TF activity in 4-day old mutants (**Fig. 5**). Overall, we believe this suggests that in  
373 the earliest stages of LEC specification Prox1 is not actively driving a fate program but rather  
374 is acting primarily to down-regulate blood vascular and hematopoietic fate. It seems likely  
375 that the negative regulation of core blood and blood vascular fate genes (those in **Fig. 7j**),  
376 would be sufficient to drive the differentiation in these earliest specified LECs.

377

378

## 379 Discussion

380 In this study, we first present a single cell RNA seq analysis of four key stages of embryonic  
381 lymphangiogenesis in a vertebrate embryo, revealing new markers and potential regulators  
382 of LEC differentiation. We further profile the ECs of *Zprox1a* mutants, which form lymphatic  
383 structures, but these “lymphatics” dedifferentiate or revert their fate to blood vascular in a  
384 mutant specific, fate-shifted, single cell cluster. This analysis identified the transcriptional  
385 code maintained by Prox1 in order to maintain LEC identity and also shows the highly  
386 conserved nature of Prox1 function comparing zebrafish with mice. Overall, the striking fate  
387 shift identified across the whole transcriptome confirms that the function of just one  
388 transcription factor (Prox1) is sufficient to maintain cellular identity, validating its status as  
389 the master regulator of LEC identity.

390

391 As well as single cell profiling of the developing LEC transcriptome, we also performed snATAC  
392 seq on 4 dpf zygotic *prox1a* mutants and wildtype, again identifying a mutant specific, fate  
393 shifted cluster in this analysis. Analysis of the wildtype LECs and VECs revealed strong

394 concordance between chromatin accessibility at LEC enhancers and the transcriptional profile  
395 for LEC and VEC specific genes. Interestingly however, analysis of the mutant cluster  
396 chromatin identified ectopically open regions and peaks with a distinct discordance between  
397 chromatin accessibility at enhancers and transcriptional profile. In the mutant cluster at 4dpf,  
398 a large number of opened chromatin regions were enriched for TF motifs for earlier acting  
399 vasculogenic and haematopoietic TFs. This suggests that regulators of earlier vascular fate  
400 become more active and increase chromatin accessibility at specific targets in the absence of  
401 Prox1. Overall, this revealed that at the level of chromatin accessibility the fate-shifted ECs  
402 display a more immature state, perhaps a consequence of regulatory “confusion” due to a  
403 failed fate transition. It seems likely that Prox1 has a combinatorial function as part of a larger  
404 GRN of developmental TFs, which has yet to be studied in detail.

405

406 Additional biological insights from this study come from our analysis of double maternal  
407 zygotic *prox1a*, *prox1b* mutants. These mutants are presumed “null” mutants for Prox1  
408 orthologues and they revealed (through scRNA seq) that during its earliest role in vascular  
409 development, in LEC fate specification and VEC-LEC transdifferentiation, Prox1 functions  
410 primarily to negatively regulate blood and blood vascular fate. While this may represent a  
411 downstream program rather than direct repression of gene expression by Prox1 orthologues,  
412 it is notable that Prox1 and *Drosophila* Prospero have been reported to be able to function as  
413 repressors in a context dependent manner<sup>51-55</sup>. Interestingly, the analysis of upregulated  
414 genes identified a set of TFs that are known early regulators of blood and blood vascular fates  
415 during embryonic haematopoiesis and vasculogenesis. These included Sox7, Etv2, Lmo2 and  
416 Lmo4 and we take this to suggest that Prox1 functions during VEC-LEC transdifferentiation at  
417 least in part by blocking expression of early acting blood vascular fate driving TFs. This is in  
418 line with maintaining a negative regulatory relationship with these and other fate driving TFs  
419 at 4 dpf as described above. It will be interesting in the future to understand at a mechanistic  
420 level if Prox1 is actively repressing gene expression at bound targets to block alternative cell  
421 fates and if so, if the activity of Prox1 switches between repressor or activator at different  
422 stages or target genes.

423

424 Altogether this study describes the process of developmental venous to lymphatic  
425 transdifferentiation, early LEC differentiation and LEC maintenance in detail, *in vivo*. We

426 describe the role of Prox1 during this process, revealing a conserved and dynamic regulatory  
427 process with unprecedented resolution. This resource will help to understand  
428 lymphangiogenesis in contexts beyond the embryo, such as in pathological  
429 lymphangiogenesis in metastasis, inflammation and tissue repair. Finally, we suggest that  
430 combining zebrafish mutant models, with their inherent ease of cellular accessibility, and the  
431 resolution afforded by single cell profiling, will be an approach that yields powerful new  
432 insights in many areas of developmental biology in the future.

433

#### 434 **Acknowledgements**

435 This project was supported in part by NHMRC Ideas grant 2004300 and ARC Discovery project  
436 DP180102846. B.M.H. was supported by NHMRC Fellowship 1155221. We thank Angelika  
437 Christ and the IMB Sequence Facility (University of Queensland), Tim Semple and Peter Mac  
438 Genomics Facility, the Research Computing Facility at Peter Mac, FACS facilities at UQ and  
439 Petermac and Isaac Virshup for assistance.

440

#### 441 **Author contributions**

442 L.G. and E.M. performed, analysed experiments and co-wrote manuscript. B.M.H, K.K and  
443 N.L.H conceptualised experiments, analysed data and co-wrote manuscript. S.D, T.C, O.Y,  
444 N.I.B, S.P, K.O, A.S and A.L. performed and analysed experiments. J.P, and K.A.S, provided key  
445 unpublished reagents and analysed data.

446

#### 447 **Conflicts of interest**

448 The authors declare no conflict of interests.

449

#### 450 **Online Methods**

##### 451 **Zebrafish husbandry**

452 Zebrafish work was conducted in compliance with animal ethics committees at the Peter  
453 MacCallum Cancer Centre, the University of Melbourne and the University of Queensland.  
454 Published transgenic lines used were: *Tg(fli1a:nEGFP)<sup>y7</sup>*<sup>56</sup>; *Tg(-5.2lyve1b:DsRed)<sup>nz101</sup>*<sup>24</sup>; and  
455 *Tg(kdrl:Has.HRAS-mCherry)<sup>sq916</sup>*<sup>21</sup>. Published mutant lines used were *prox1a<sup>i278</sup>*<sup>20</sup>, *prox1b<sup>4,19</sup>*.  
456 *Tg(lyve1b:Venus)<sup>uq51bh</sup>* was generated as previously described<sup>28</sup> but here using an  
457 independent genomic integration with the same construct.

458

### 459 **Generation of maternal zygotic mutants**

460 Germline replacement was performed using embryonic transplantation as previously  
461 described<sup>4,57</sup>. Maternal zygotic (MZ) *prox1a* mutant embryos were made by crossing germline  
462 replaced *prox1a*<sup>i278-/-</sup>;*prox1b*<sup>sa0035+/-</sup> females with *prox1a*<sup>i278+/-</sup>;*prox1b*<sup>sa0035+/-</sup> males<sup>4,57</sup>.  
463 Genotyping of individual embryos during transplantation and phenotypic analysis was  
464 performed as previously described<sup>4</sup>.

465

### 466 **Transgenesis, genome-editing and genotyping**

467 All microinjections were performed as previously described<sup>58</sup>. *slc7a7a*<sup>BAC</sup>:*slc7a7a-Citrine*<sup>uom10</sup>  
468 and *fabp11a*<sup>BAC</sup>:*fabp11a-Citrine*<sup>uom10</sup> recombineering was performed as previously described  
469 <sup>59</sup>.

470 Primers for BAC recombineering:

471 *slc7a7a*-BAC-Citrine-forward:5'-

472 AACTGCTTTAGACAGTGTTTTTTGGTACCATCCCATATATTTAAAAACAGCCACCATGGTGA  
473 GCAAGGGCGAGGAG-3'

474 *slc7a7a*-BAC-Citrine-reverse:5'-

475 TTCGACACCTCAGGGGATGCCTCTTCTGCAGGCGTAGGGCTGTAGGACGCTCAGAAGAACT  
476 CGTCAAGAAGGCG-3'

477 *fabp11a*-BAC-Citrine-forward:5'-

478 TTACAGCTGTTGCGAGATTGAAAAGTAGAGGAGCATCATTATTCGGGAAAGCCACCATGGT  
479 GAGCAAGGGCGAGGAG-3'

480 *fabp11a*-BAC-Citrine-reverse:5'-

481 TCAAAGTTGTCGCTGGTGGTCATTTCCACGTTCTACGAATTTGTCAACTCAGAAGAACTC  
482 GTCAAGAAGGCG-3'

### 483 **Enhancer detection transgenesis and analysis**

484 A 501bp PCR fragment of *cdh6* enhancer (*chr2:28150709-28151209*) was cloned into the  
485 zebrafish enhancer detection (ZED) vector<sup>40</sup>. Empty ZED vector was injected as previously  
486 described<sup>40</sup>. Briefly, 1nL of construct at 40 ng/μl or 45ng/μL and tol2 transposase mRNA at  
487 100 ng/μl or 55ng/μl was injected into the one-cell stage wild type zebrafish embryos. All F0  
488 embryos were screened for skeletal muscle DsRed2 expression. Stable F1 embryos were  
489 imaged on a Zeiss LSM 780 or Leica TCS SP8 DLS microscope. Images were processed using

490 ImageJ 2.0.0. or 2.3.0.

491

## 492 **Imaging and quantification**

493 Imaging was conducted at the Centre for Advanced Histology and Microscopy (Peter  
494 MacCallum Cancer Centre). Imaging of live samples was performed using a Zeiss LSM 710 FCS  
495 confocal microscope, a Zeiss LSM 780 FCS confocal microscope, or an Olympus FV3000  
496 confocal microscope. Mounting and imaging were performed as previously described<sup>60</sup>. In  
497 **Figs 6e-f,i-k, and Extended data Fig 5f-h, k-m** quantification of vascular phenotypes was  
498 performed as previously described<sup>60,61</sup>. In Figs 3h-k, *cdh5:Venus* or *kdrl:GFP* intensity in the  
499 TD was measured using Imaris software (Bitplane) and normalised to fluorescence intensity  
500 of the DA for *cdh5* and to the fluorescence intensity PCV for *kdrl* in the same embryos.

501

## 502 **Fluorescence activated cell sorting**

503 FACS was performed at the Peter MacCallum Cancer Centre and the University of  
504 Queensland. For **Fig 1**, we isolated cells using the following transgenic lines: 40hpf,  
505 *Tg(fli1a:nEGFP)<sup>y7</sup>*; 3,4 and 5dpf, *Tg(-5.2lyve1b:Venus)<sup>uq47bh</sup>*, *Tg(kdrl:Has.HRAS-mCherry)<sup>s916</sup>*  
506 For **Fig 3 and Fig 4**, we isolated cells using the following transgenic lines: 4dpf,  
507 *Tg(fli1a:nEGFP)<sup>y7</sup>*, *Tg(-5.2lyve1b:DsRed)<sup>nz101</sup>*. For **Fig 6**, we isolated cells using the following  
508 transgenic lines: 40hpf, *Tg(fli1a:nEGFP)<sup>y7</sup>*. To dissociate embryos and obtain single cell  
509 suspensions, we followed published protocols<sup>62</sup>. Briefly, at the desired developmental stage  
510 we deyolked embryos by pipetting up and down and rinsing in calcium free ringers solution,  
511 we centrifuged at 2000rpm for 5' at 4°C and remove supernatant and dissociated the cells by  
512 incubating in liberase [2.5mg/mL] (Cat #5401119001 Sigma-Aldrich) diluted at a 1:35 ratio in  
513 DPBS at 28.5°C for approximately 5', homogenizing the samples during and after the  
514 incubation. To stop the reaction, we added CaCl<sub>2</sub> to a final concentration of 1-2mM and FBS  
515 to a final concentration of 5-10%. We centrifuged at 2000rpm for 5' at 4°C. discarded the  
516 supernatant, in order to be able to asses live vs. dead cells, we re-suspend the cells solution  
517 in Zombie Violet TM Viability Dye (Cat# 423113, BioLegend) and incubated for 20' at RT softly  
518 rocking, we rinsed the cells by centrifuging and resuspending in DPBS/EDTA, for ATAC-seq  
519 experiments samples were resuspended in 2%BSA/PBS. Suspension was filtered through a  
520 strainer and taken to the FAC sorting facility. In the Flow Cytometry facility, we used the BD  
521 FACS Aria Fusion sorter (BD Biosciences), we based the selection for the desired population



522 on FSC and SCC, alive cells were selected based on the Zombie Violet profile and double  
523 positive cells for the desired transgenics were targeted according to the expression profiles  
524 of single cells. Double positive cells were sorted in 300uL 100% FBS in a cold block and taken  
525 immediately to the sequencing facility.

526

### 527 **scRNA-seq library preparation**

528 Library preparation and sequencing was performed at the Institute for Molecular Bioscience  
529 Sequencing Facility (University of Queensland) or Peter Mac Genomics Facility. Single cell  
530 suspensions were sorted by FACS, spun down to concentrate and a cell count was performed  
531 to determine post-sort viability and cell concentration. Single cell suspension was partitioned  
532 and barcoded using the 10X Genomics Chromium Controller (10X Genomics) and the Single  
533 Cell 3' Library and Gel Bead Kit (V2 10X Genomics PN-120237; V3.1; 10X Genomics; PN-  
534 1000123). The cells were loaded onto the Chromium Single Cell Chip A (10X Genomics; PN-  
535 120236), B (10X Genomics; PN-1000073 or PN-1000074) or G (10X Genomics; PN-1000120)  
536 to target 10,000 cells. GEM generation and barcoding, cDNA amplification, and library  
537 construction was performed according to the 10X Genomics Chromium User Guide. The  
538 resulting single cell transcriptome libraries contained unique sample indices for each sample.  
539 The libraries were quantified on the Agilent BioAnalyzer 2100 using the High Sensitivity DNA  
540 Kit (Agilent, 5067-4626). Libraries were pooled in equimolar ratios, and the pool was  
541 quantified by qPCR using the KAPA Library Quantification Kit - Illumina/Universal (KAPA  
542 Biosystems, KK4824) in combination with the Life Technologies Viia 7 real time PCR  
543 instrument. After the initial sequencing run, libraries were re-pooled according to estimated  
544 captured cells as determined using the Cell Ranger software (10X Genomics).

545

### 546 **Sequencing of scRNA-seq libraries**

547 At the IMB(UQ) genomics facility, denatured libraries were loaded onto an Illumina NextSeq-  
548 500 and sequenced using a 150-cycle High-Output Kit as follows: 26bp (Read1), 8bp (i7 index),  
549 98bp (Read2). Read1 supplies the cell barcode and UMI, i7 the sample index, and Read2 the  
550 3' sequence of the transcript. At the Peter Mac Molecular Genomics facility, single cell  
551 transcriptome libraries were sequenced on an Illumina NovaSeq 6000 using S4 300-cycle  
552 chemistry. Read1 supplies the cell barcode and UMI, i7 the sample index, and Read2 the 3'  
553 sequence of the transcript. Sequencing read lengths were trimmed to 28bp (Read1), 8bp (i7

554 index), 91bp (Read2), ensuring compatibility with the 10X Genomics analysis software, Cell  
555 Ranger.

556

### 557 **scRNA-seq data processing and analysis**

558 All code and documentation associated with this analysis is publicly available under an open  
559 source software license at:

560 [https://atlassian.petermac.org.au/bitbucket/users/tyrone.chen/repos/hogan\\_lab/browse/2](https://atlassian.petermac.org.au/bitbucket/users/tyrone.chen/repos/hogan_lab/browse/2022_Grimm_Mason_et_al_PROX1/)  
561 [022\\_Grimm\\_Mason\\_et\\_al\\_PROX1/](https://atlassian.petermac.org.au/bitbucket/users/tyrone.chen/repos/hogan_lab/browse/2022_Grimm_Mason_et_al_PROX1/)

562 Relevant functions are in italics for reference. Where necessary fastq files were made using  
563 *Cell Ranger*<sup>63</sup> (version 3.1.0 or 3.0.2) *mkfastq*. Sequencing QC was assessed using *FastQC*  
564 0.11.6 and *MultiQC* viewer for aggregated reports. *Cell Ranger count* and *aggr* were used to  
565 generate aggregated count files mapped to GRCz11 (Ensembl 101), without depth  
566 normalisation. Doublets were identified from the filtered aggregated count files using  
567 *Scrublet*<sup>64</sup> in *Python* version 3.6 and filtered from subsequent analyses. For the *MZprox1*<sup>-/-</sup>  
568 mutant and *Zprox1*<sup>-/-</sup> mutant datasets filtered aggregated count files were processed, sc-  
569 transform normalised, filtered and clustered (louvain) using *Seurat* version 2.0<sup>65</sup> and 3.0<sup>34</sup>  
570 respectively for *R statistical software* version 4.0.2. QC was evaluated before and after  
571 normalisation using plot functions in *Seurat* and *scater* 1.20.1<sup>66</sup>, and all thresholds and  
572 settings are described in scripting. Cluster solutions were evaluated using *ClusTree*<sup>67</sup>.  
573 Datasets used in the atlas of lymphangiogenesis were processed, filtered, merged and log-  
574 normalised using *Seurat* version 3.0<sup>34</sup>, with QC and settings as above. Merged data was  
575 clustered and normalised using *CSS simspect*<sup>33</sup> and clustering and cluster evaluation  
576 performed on this object only, as described above. For all scRNA-seq datasets cluster  
577 phenotype was determined using the expression of key markers (Supplementary Table), with  
578 the aid of *CellXGene* visualisation software<sup>68</sup>. All downstream analysis and plotting were  
579 performed using *Seurat* version 3.0<sup>34</sup> with default settings. All gene ontology analyses were  
580 performed using Panther.db<sup>37</sup> (Biological Process Complete).

581

### 582 **Preparation of single nuclei for snATAC-seq**

583 Single cell suspensions were sorted by FACS and prepared for nuclei isolation as previously  
584 described by 10x Genomics Demonstrated Protocol for Single Cell ATAC Sequencing  
585 (CG000169 - Rev D). Cell suspensions were pelleted (300 x g for 5 minutes) and rinsed with

586 PBS + 0.04% BSA. Cells were resuspended in 95uL of freshly prepared lysis buffer (10mM Tris-  
587 HCl pH 7.4, 10 mM NaCl, 3 mM MgCl<sub>2</sub>, 0.1% Tween-20, 0.1% NP40 Substitute, 0.01%  
588 Digitonin, and 1% BSA) and incubated on ice for 1 minute. 100uL of chilled wash buffer  
589 (10 mM Tris-HCl, pH 7.4, 10 mM NaCl, 3 mM MgCl<sub>2</sub>, 0.1% Tween-20, 1% BSA) was used to  
590 neutralise the reaction, before the nuclei were pelleted (500 x g for 5 minutes) and  
591 resuspended again in 7uL of 1x Nuclei Buffer (10X Genomics Cat# PN-2000153/2000207).  
592 Presence of healthy and intact nuclei was assessed by visual inspection on a brightfield  
593 microscope using Trypan Blue staining (Thermo Fisher Cat# T10282) and Countess Cell  
594 Counting Chamber Slides (Thermo Fisher Cat# C10228).

595

### 596 **snATAC-seq library preparation and sequencing**

597 Single nuclei suspensions were resuspended at approximately 5000 nuclei per  $\mu$ L before  
598 undergoing tagmentation for 60min at 37°C. After tagmentation nuclei were partitioned and  
599 barcoded using the 10X Genomics Chromium Controller (10X Genomics) and the Single Cell  
600 ATAC Reagent Kit (V1.1; 10X Genomics; PN-1000176 ). Tagmented nuclei were loaded onto  
601 the Chromium Single Cell Chip H (10X Genomics; PN-1000162), GEM generation, barcoding  
602 and library construction was performed according to the 10X Genomics Chromium User  
603 Guide. The resulting single cell ATAC libraries contained unique sample indices for each  
604 sample. The libraries were quantified on the Agilent BioAnalyzer 2100 using the High  
605 Sensitivity DNA Kit (Agilent, 5067-4626) and pooled in equimolar ratios. Sequencing was  
606 performed on an Illumina NextSeq 500 using a 150-cycle High-Output Kit as follows: 50bp  
607 (Read1), 8bp (i7 index), 16bp (i5 index), 50bp (Read2) achieving a read depth of 25,000 read  
608 pairs per nucleus.

609

### 610 **snATAC-seq processing and analysis**

611 FASTQ files generated from sequencing were used as inputs to 10X Genomics *Cell Ranger*  
612 *ATAC 2.0.0*. *cellranger-atac count* was used to generate count files mapped to GRCz11  
613 (ENSEMBL 101), without depth normalisation. Resulting fragment files were read into *ArchR*  
614 *1.0.1* for *R statistical software 4.0.5* as a tile matrix with 500-bp bins. All remaining steps in  
615 the ATAC-Seq analysis were performed within *ArchR 1.0.1*. QC filtering was performed, and  
616 only high-quality cells with a TSS enrichment score greater than 4 and greater than 1,000  
617 unique nuclear fragments were retained. Doublets were predicted using *addDoubletScores*

618 and filtered using *filterDoublets*. Data normalization and dimensionality reduction were  
619 performed using iterative Latent Semantic Indexing (LSI) and Uniform Manifold  
620 Approximation and Projection (UMAP) embeddings were used for visualisation in reduced  
621 dimension space. Separate from the *ArchR 1.0.1* package, cluster solutions were  
622 independently evaluated using *clustree 0.4.3*. A Gene Score Matrix that stores predicted gene  
623 expression was then generated based on the accessibility of regulatory elements in the  
624 vicinity of the gene. We used gene scores of endothelial markers for cluster annotation and  
625 subsetting. Differentially accessible genes were identified by differential testing using  
626 *getMarkerFeatures*. Local chromatin accessibility of the marker genes was visualised using  
627 the *plotBrowserTrack*.

628

### 629 **Gene regulatory network analyses**

630 For gene regulatory network construction we leveraged the ENCODE transcription factor  
631 targets gene-attribute edge list from the Harmonize database  
632 <https://maayanlab.cloud/Harmonizome/dataset/ENCODE+Transcription+Factor+Targets>  
633 that includes information for n=181 transcription factors from ChIP-seq analyses<sup>42</sup>. Gene lists  
634 generated from scRNA-seq or snATAC-seq analysis were mapped from Zebrafish genome  
635 version GRCz11 to Human genome version GRCh38.p13 using ENSEMBL Biomart <sup>69</sup>. These  
636 mapped gene sets were used to select relevant edges, that were visualised as a degree-sorted  
637 circular network in Cytoscape<sup>70</sup>.

638

639

640

641

642 **FIGURES AND FIGURE LEGENDS**

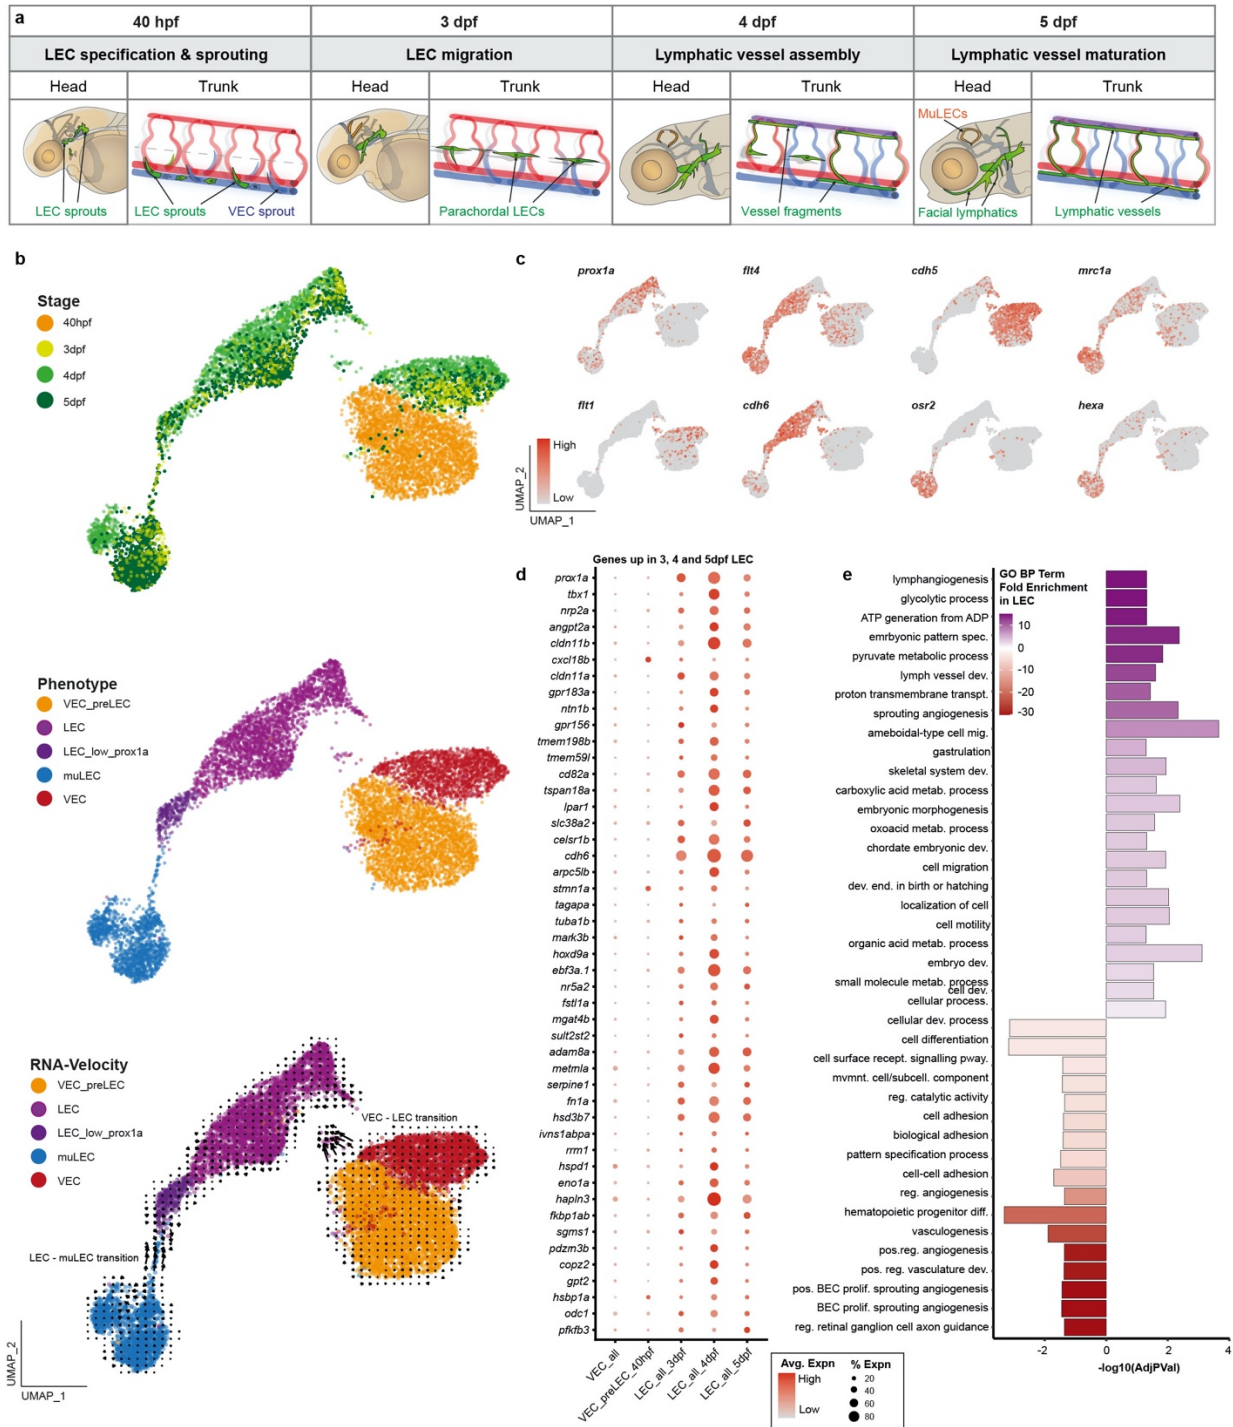

643

644 **Figure 1: A single cell RNAseq developmental atlas of lymphangiogenesis in zebrafish**

645 **a.** Schematic representation of four key stages of zebrafish lymphatic development in  
 646 head and trunk: 40hpf encompasses both specification (Prox1-induction) and  
 647 sprouting; 3dpf migration of LECs; 4dpf assembly of lymphatic vessels; 5dpf  
 648 maturation functional lymphatics.

- 649       **b.** UMAP visualization of n=9,771 cells filtered for VEC and LEC populations (n=6 samples;  
650       see **Extended data table 1a** for cluster identification and **Extended data Fig 1** for  
651       whole dataset) coloured according to developmental stage (top), predicted cell  
652       phenotype (middle), and RNA-velocity (bottom).
- 653       **c.** UMAP visualization of key marker gene expression. Colour scale represents log-  
654       normalised expression. LEC markers: *prox1a*, *cdh6*. BEC markers: *cdh5*. LEC and VEC  
655       markers: *mrc1a*, *flt4*. AEC marker: *flt1*. muLEC markers: *osr2*, *hexa*.
- 656       **d.** Dot plot of top genes commonly marking LECs at 3, 4 and 5dpf, with expression  
657       displayed in VECs (all stages), VEC\_preLEC (40hpf) and LECs at 3, 4 and 5dpf (see also  
658       **Extended data table 1b**, **Extended data Fig 1f**). Colour scale represents average log-  
659       normalised expression and point size represents percentage of cells expressing gene.
- 660       **e.** Bar plot summarizing GO BP analyses of genes DE between 3, 4 and 5dpf LEC and VEC  
661       populations (**Extended data table 1c-d**). Y-axis represents enriched BP term, x-axis  
662       represents the  $-\log_{10}(\text{adjusted } p \text{ value})$ , bars are coloured and ordered according to  
663       fold enrichment of the GO term in LEC. GO terms enriched in LEC are coloured purple,  
664       terms enriched in VEC are coloured red.

665 Hpf, Hours post-fertilisation.dpf, Days post fertilisation. BEC, Blood vascular endothelial cell.  
666 VEC, Venous endothelial cell. LEC, Lymphatic endothelial cell. muLEC, mural Lymphatic  
667 endothelial cell (a.k.a FGP or brain LEC).

668

669

670

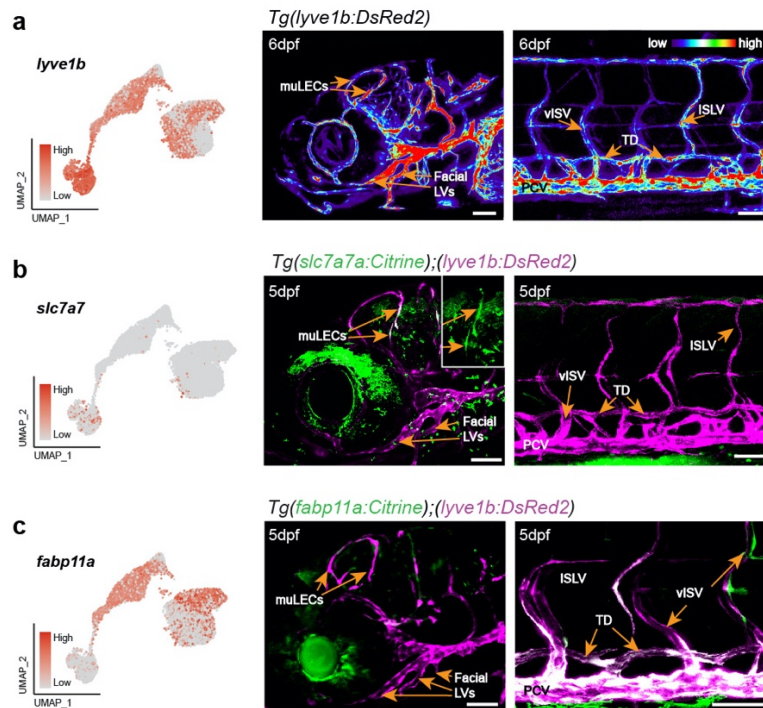

671

672 **Figure 2: Transgenic marker strains confirm cluster identity and identify vessel specific**  
673 **markers**

674 a. UMAP of *lyve1b* expression predicts higher expression in muLECs than LEC populations  
675 (left), confirmed by a heat map of a *Tg(lyve1b:DsRed2)* zebrafish larvae at 6dpf  
676 showing high *lyve1b* expression in craniofacial (middle) and moderate expression in  
677 trunk lymphatic vessels (right).

678 b. UMAP of *slc7a7* expression predicts restricted expression in muLEC populations (left),  
679 confirmed in lateral confocal projections showing co-expression of *lyve1b* (magenta)  
680 and a new BAC transgenic strain for *slc7a7a* (green) in the zebrafish head at 5dpf  
681 (middle) which is not expressed in veins and lymphatic vessels of the trunk (right).

682 c. UMAP of *fabp11a* expression predicts expression in LEC and VEC but not muLEC  
683 populations (left), confirmed in lateral confocal projections showing co-expression of  
684 *lyve1b* and a new BAC transgenic strain for *fabp11a* marking venous and lymphatic  
685 vessels in the trunk (right) without showing expression in the vasculature of the head  
686 (middle) at 5dpf.

687 Lateral confocal images, anterior to the left. muLECs, mural lymphatic endothelial cells; facial  
688 LV, facial lymphatic vessels; visV, venous intersegmental vessel; PCV, posterior cardinal vein;  
689 TD, thoracic duct; ISLV, intersomitic lymphatic vessel. Scale bars, 80  $\mu$ m for head (middle) in  
690 (a) and 50  $\mu$ m for trunk images (right).

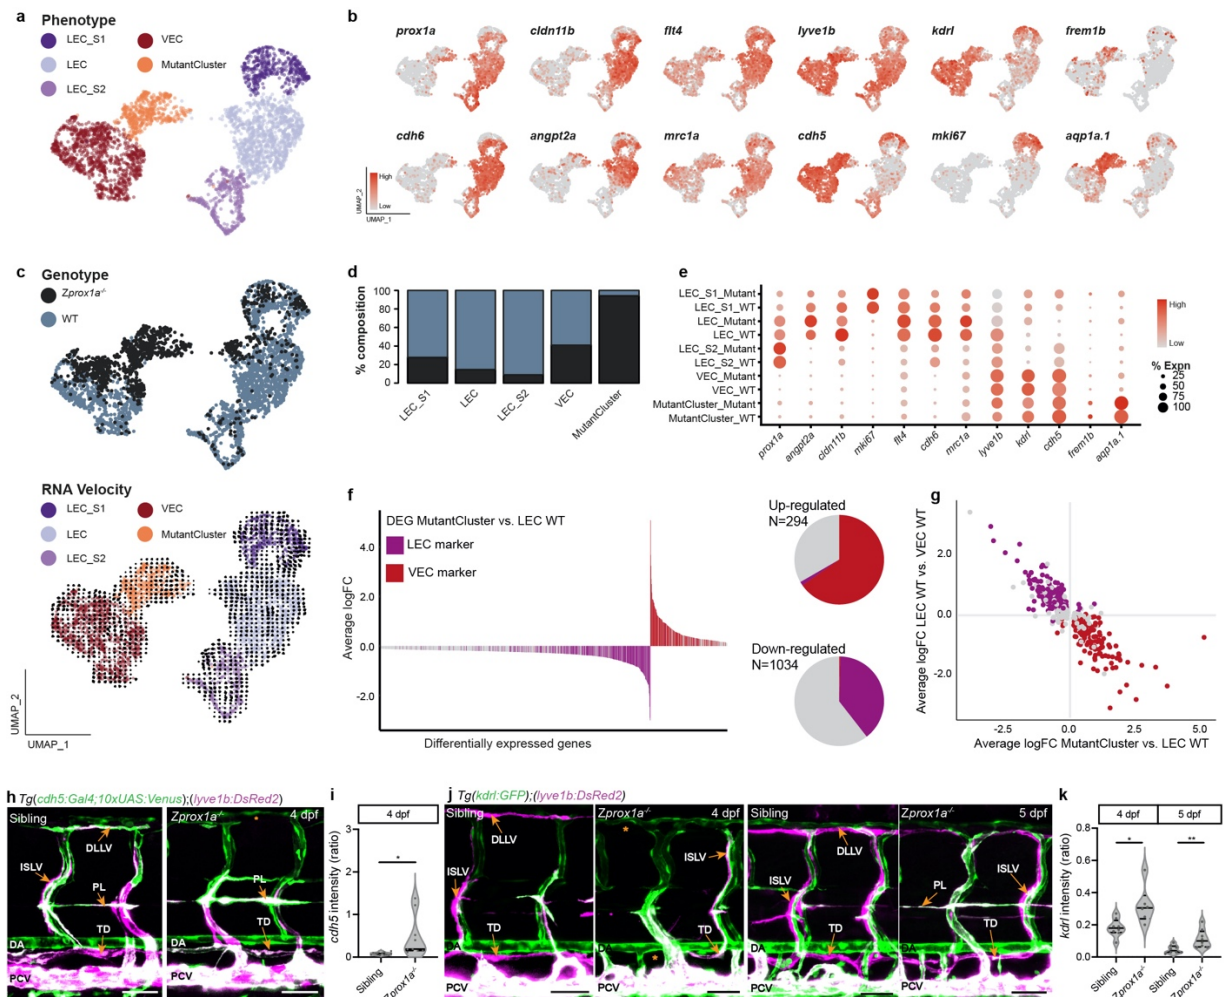

691

692 **Figure 3: Single cell RNA seq analysis reveals a fate shift from LEC to VEC in the absence of**  
 693 **Prox1 in zygotic *prox1a* mutants**

694 a. UMAP visualization of n=8,075 cells filtered for VEC and LEC subpopulations (n=2  
 695 samples; see **Extended data table 2a** for cluster annotation, **Extended data Fig3** for  
 696 full dataset) coloured according to predicted cell phenotype.

697 b. UMAP visualization of marker gene expression. Colour scale represents SCT-  
 698 normalised expression. LEC markers: *prox1a*, *cldn11b*, *cdh6*, *angpt2a*. LEC and VEC  
 699 markers: *flt4*, *mrc1a*, *lyve1b*. BEC markers: *cdh5*, *kdrl*. Mutant cluster markers: *frem1b*,  
 700 *aqp1a.1*.

701 c. UMAP visualization with cells coloured according to genotype (*Zprox1a*<sup>-/-</sup> or WT)  
 702 identifies a mutant specific cluster and RNA velocity analysis suggests a trajectory  
 703 between the mutant cluster and the LEC cluster, likely indicative of a fate shift.

704 d. Stacked bar plot representing the genotype composition of cells in a given phenotypic  
 705 cluster.



- 706 e. Dot plot of marker expression across defined clusters (indicated on Y-axis). Colour  
707 scale represents average SCT-normalised expression and point size represents  
708 percentage of cells expressing gene.
- 709 f. Bar plot of average log fold change in gene expression comparing WT LECs with the  
710 Mutant Cluster. Y-axis represents average log fold change, x-axis represents  
711 differentially expressed genes (Wilcoxin Rank Sum *adjusted p value* < 0.05) and bars  
712 are coloured according to status as a LEC (purple) or VEC (red) marker in **Fig. 1**. Pie  
713 charts (right) indicate the LEC and VEC marker composition of genes up-regulated  
714 (n=365) and down regulated (n=1,922) in the Mutant Cluster, demonstrating a fate  
715 shift.
- 716 g. Concordance in the fate shift between Mutant Cluster and WT LEC with the WT LEC  
717 and VEC trajectory. Each point represents significant DE genes (n=2,287) between  
718 Mutant Cluster and LEC WT, coloured according to LEC or VEC marker status. X-axis  
719 represents average log fold change relative to the Mutant Cluster, Y-axis represents  
720 average log fold change relative to LEC WT.
- 721 h. Lateral confocal images of *cdh5* (green) and *lyve1b* (magenta) expression in the  
722 developing trunk in WT and *Zprox1a* mutants at 4dpf.
- 723 i. Quantification of *cdh5* intensity in the thoracic duct in WT and mutants (relative to  
724 expression in the DA).
- 725 j. Lateral confocal images of *kdrl* (green) and *lyve1b* (magenta) expression at 4dpf (left)  
726 and 5dpf (right).
- 727 k. Quantification of *kdrl* intensity in the thoracic duct in WT and mutants (relative to  
728 expression in the PCV) at 4 and 5dpf.

729 WT, wildtype. Z, zygotc. TD, thoracic duct, DA, Dorsal Aorta. PCV posterior cardinal vein. ISLV,  
730 intersomitic lymphatic vessel. DLLV, Dorsal longitudinal lymphatic vessel. PL, parachordal LEC.  
731 Scale bars, 50  $\mu$ m. \*, The error bars represent mean  $\pm$  s.e.m.; \*p=0.01 and \*\*p=0.0094 from  
732 an unpaired, two-sided t-test.

733

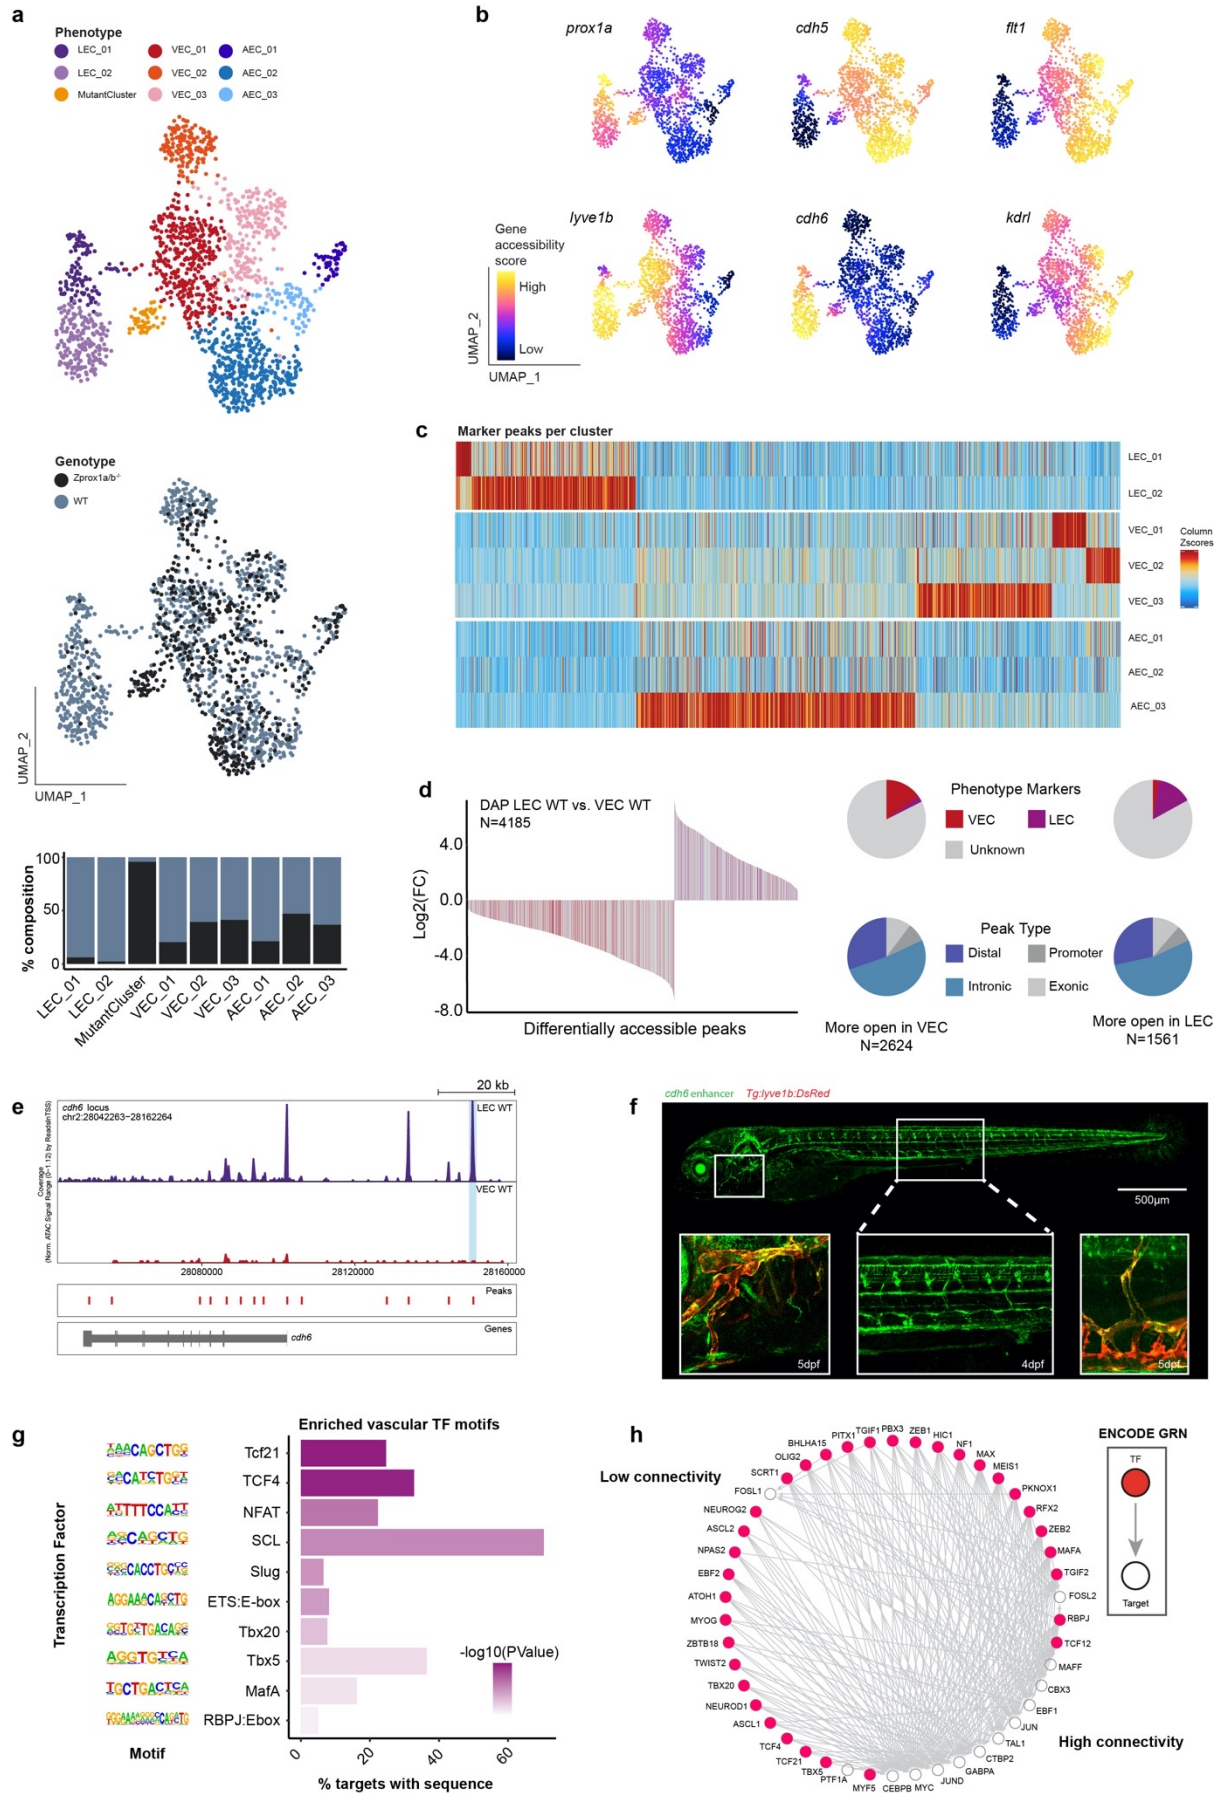

735 **Figure 4: Single nuclei ATAC seq identifies lineage specific regulatory regions in VECs and**  
736 **LECs**

737 a. UMAP visualization of snATAC-seq from *Zprox1a*<sup>-/-</sup> mutant and WT endothelial cells at  
738 4dpf (n=3,731 nuclei), coloured by cell phenotype (top) and genotype (middle) (see  
739 **Extended data Fig 4** for full dataset). Stacked bar plot (bottom) summarising the  
740 composition of wildtype and mutants in each cluster. A mutant specific cluster is  
741 identified, similar to **Fig 3**.

742 b. UMAP visualization indicating accessibility of key marker genes (gene accessibility  
743 score with imputation) that confirm predicted cluster phenotypes. LEC markers:  
744 *prox1a*, *cdh6*. VEC markers: *cdh5*, *flt1*, *kdrl*.

745 c. Heatmap of cluster specific accessible peaks defined using DAP analysis, for all  
746 endothelial cells. Colour reflects a column-wise Z-score, rows represent clusters  
747 defined in **Extended data Fig 4a** and columns are peaks.

748 d. Bar plot of log2 fold change for the differentially accessible peaks (n=4,185 peaks,  
749 Wilcoxon Rank Sum, *FDR* < 0.05) between WT LECs and WT VECs. LEC/VEC markers  
750 identified in scRNA-seq are coloured in red/purple respectively and demonstrate a  
751 strong correlation between chromatin state and the VEC to LEC fate shift. 228/1,561  
752 more accessible peaks in the LEC cluster were associated with LEC markers and  
753 398/2,624 more accessible peaks in VEC cluster associated with VEC markers. Pie  
754 charts (right) summarising the proportion of LEC/VEC markers in the differentially  
755 accessible peaks (top) and the type of peak (bottom).

756 e. Genome accessibility track of LEC marker *cdh6*. Red bars represent peaks in the  
757 reproducible peak set from snATAC-seq. The peak highlighted blue indicates a  
758 potential enhancer of *cdh6* (*chr2:28150709-28151209*) with significantly more  
759 accessible chromatin in WT LECs compared to WT VECs (Wilcoxon Rank Sum, *FDR* <  
760 0.05).

761 f. Overall GFP expression of *cdh6* enhancer (*chr2:28150709-28151209*) reporter at 4dpf  
762 (top). Lateral confocal image of *cdh6* enhancer reporter in the trunk at 4dpf (bottom  
763 middle). Co-expression of *cdh6* enhancer reporter (green) and *lyve1b* (red) in the  
764 facial lymphatics (bottom left) and trunk lymphatics (bottom right) at 5dpf.

765 g. Vascular TF motifs (n=10 from top n=50) enriched in peaks that are more permissive  
766 in WT LEC compared to WT VEC. The depth of bar colour represents the -

767  $\log_{10}(\text{RawPVal})$ , y-axis displays individual motifs and schematic (left) and x-axis  
768 represents the percentage of target regions enriched for the motif in the n=1561 peak  
769 set more open in WT LEC.

770 **h.** Degree-sorted gene regulatory network displaying known TF binding at genes with  
771 more permissive chromatin in WT LECs compared to WT VECs. TFs are represented  
772 by red circles (nodes), target genes by white circles (nodes), and known binding of TF  
773 to target by a grey arrow (edges). Nodes with a larger number of edges are more  
774 highly connected (bottom right), and nodes with fewer edges are less connected (top  
775 left).

776

777 DAP, differentially accessible peaks. FDR, false discovery rate. snATAC-seq, single nuclei

778 ATAC-seq. TF, transcription factor.

779

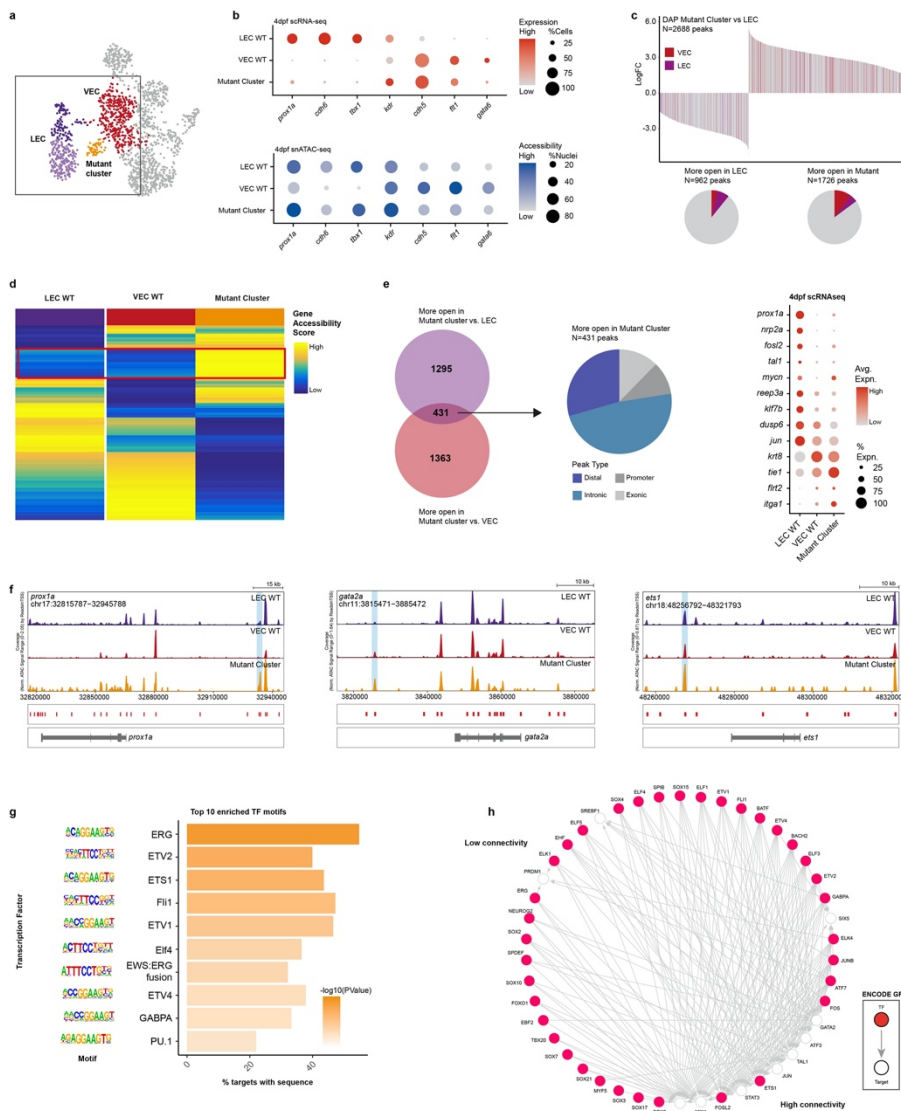

780

781 **Figure 5: Zygotic *prox1a* mutants display a unique chromatin accessibility state consistent**  
 782 **with increased activity of early blood and blood vascular fate transcription factors**

783 **a.** Schematic illustrates DAP analyses between Mutant Cluster vs. LEC WT and Mutant  
 784 Cluster vs. VEC WT.

785 **b.** Dot plots of scRNA-seq (top) and snATAC-seq accessibility (bottom) data summarizing  
 786 the behaviour of key LEC (*prox1a*, *cdh6*, *tbx1*, *kdr*) and VEC (*cdh5*, *flt1*, *gata6*) markers  
 787 in WT LECs, WT VECs and the Mutant Cluster at 4dpf. LEC genes are upregulated  
 788 (scRNA-seq) and chromatin is more permissive (snATAC-seq) in WT LEC, and VEC genes  
 789 are upregulated and more permissive in WT VEC. This concordance between gene  
 790 expression and chromatin accessibility is lost in the Mutant Cluster. The size of the  
 791 dots represents the proportion of cells or nuclei, and colour represents either SCT-  
 792 normalised expression or gene score of accessibility.

- 793 c. Bar plot of log<sub>2</sub> fold change for the differentially accessible peaks (n=2,688 peaks,  
794 Wilcoxon Rank Sum, *FDR* < 0.05) between Mutant Cluster and WT LECs. LEC/VEC  
795 markers identified in scRNA-seq are coloured in purple/red respectively and  
796 demonstrate regions more open in the Mutant are associated with more vascular than  
797 lymphatic genes. Pie charts (bottom) summarising the proportion of LEC/VEC markers  
798 in the differentially accessible peaks.
- 799 d. Heatmaps of accessibility (gene accessibility score) for all genes (n=32,020) in WT LECs,  
800 WT VECs and Mutant Cluster showing that mutant cluster cells display a unique  
801 chromatin state at many genes. Red box indicates genes that are more permissive in  
802 the Mutant Cluster than either WT LEC or WT VEC. Colour indicates level of  
803 accessibility.
- 804 e. Venn diagram (left) indicates all individual peaks with increased in accessibility in the  
805 Mutant Cluster vs LEC or VEC, with n=431 DAP commonly more open than in both LEC  
806 WT and VEC WT (*FDR* < 0.05, log<sub>2</sub> fold change > 1.5). Pie chart (middle) indicates the  
807 proportion of peak types for n=431 DAP classified as distal, intronic, promoter and  
808 exonic respectively. Dot plot (right) summarizing the scRNA-seq expression level of  
809 n=13 genes with DAP more open in the Mutant Cluster at 4dpf, demonstrating that  
810 accessibility changes for these genes did not correlate with changes in transcription.  
811 The size of the dot represents the proportion of cells that express the markers in the  
812 cluster, and colour represents SCT-normalised expression.
- 813 f. Genome accessibility tracks for key markers with DAP more permissive in the Mutant  
814 Cluster: *prox1a*, *gata2a* and *ets1* (left to right). Red bars represent peaks in the  
815 reproducible peak set from snATAC-seq. Blue bars highlight DAP (Wilcoxon Rank Sum,  
816 *FDR* < 0.05).
- 817 g. Top 10 enriched motifs (HOMER analysis, *adjusted p value* < 0.05) in the n=431 peaks  
818 that are more open in the Mutant Cluster than WT LEC and VEC. The depth of colour  
819 represents the -log<sub>10</sub>(*RawPVal*), y-axis displays individual motifs and schematics (left),  
820 and x-axis represents the percentage of peaks enriched for the motif in the n=431  
821 peak set.
- 822 h. Degree-sorted gene regulatory network displaying known TF binding at genes with  
823 more permissive chromatin in Mutant Cluster compared to WT LECs. TFs are  
824 represented by red circles (nodes), target genes by white circles (nodes), and known

825 binding of TF to target by a grey arrow (edges). Nodes with a larger number of edges  
826 are more highly connected (bottom right), and nodes with fewer edges are less  
827 connected (top left).

828

829 DAP, differentially accessible peaks. FDR, false discovery rate. snATAC-seq, single nuclei

830 ATAC-seq. TF, transcription factor.

831

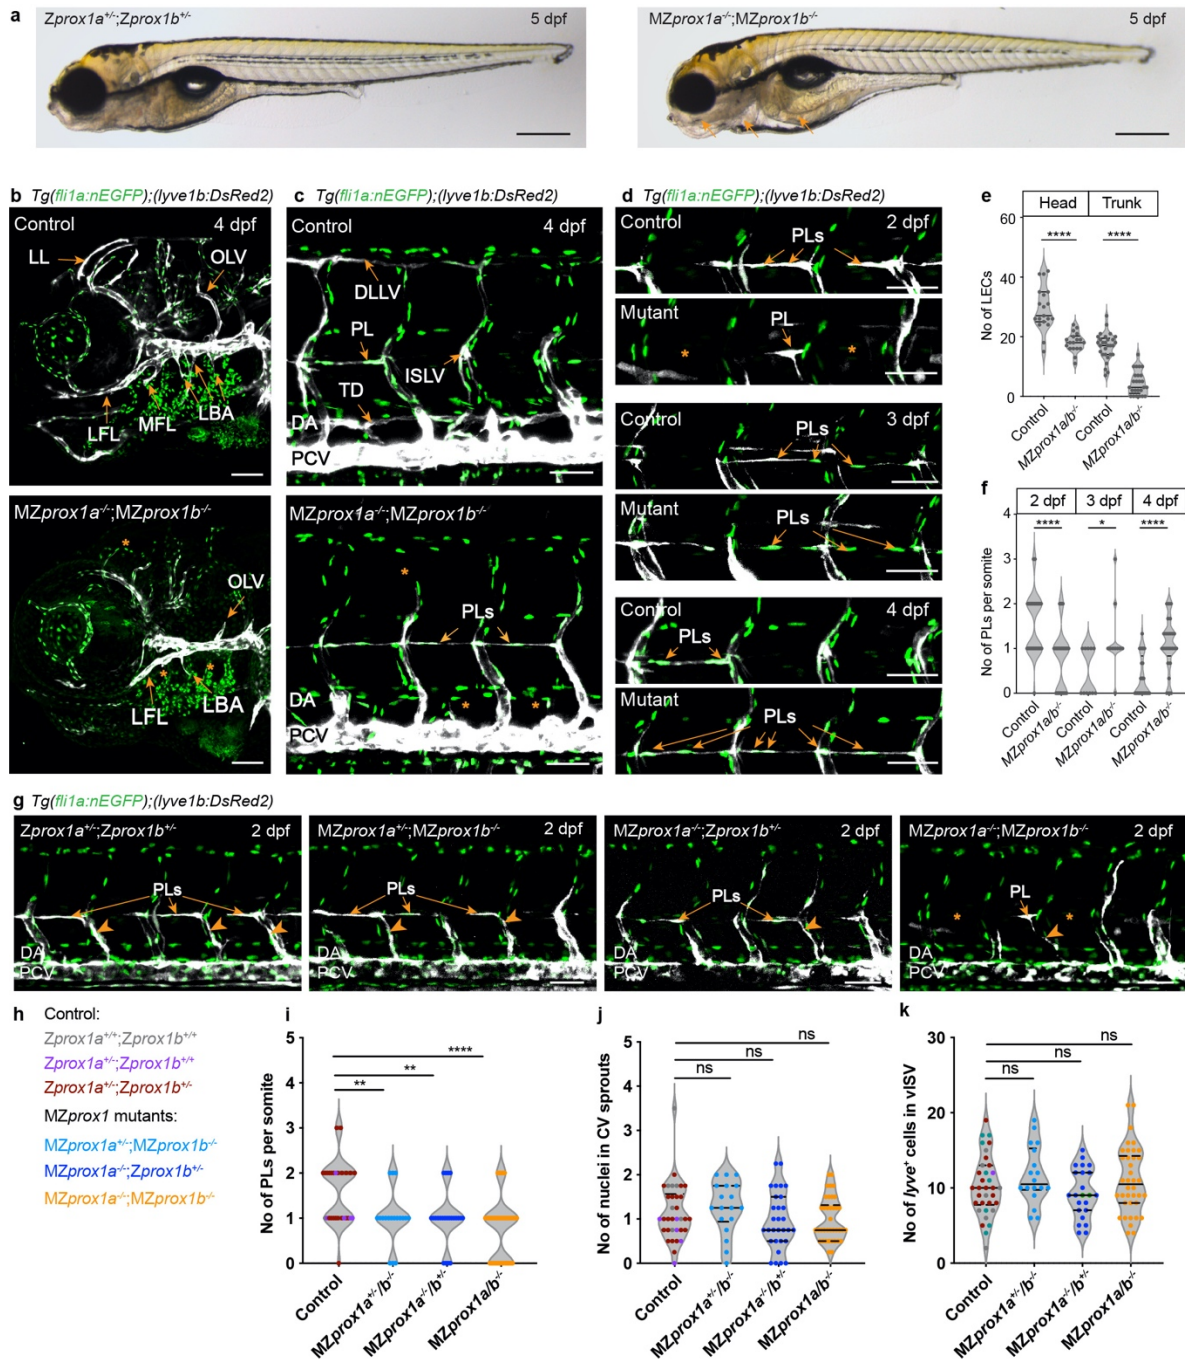

832

833 **Figure 6: maternal zygotic *prox1a;prox1b* double mutants display a specific loss of lymphatic**  
834 **vessels throughout the developing embryo**

835 **a.** Overall morphology of control and *MZprox1a<sup>-/-</sup>;MZprox1b<sup>-/-</sup>* mutants at 5dpf. Arrows  
836 indicate oedema around eyes, heart and intestine. Scale bars 500  $\mu$ m.

837 **b.** Lateral confocal images of zebrafish heads at 4dpf showing endothelial cell nuclei  
838 (green) and venous and lymphatic vessels (white) in control (upper) and *MZprox1a<sup>-/-</sup>;*  
839 *MZprox1b<sup>-/-</sup>* embryos (lower). Facial lymphatics are absent or shorter or missing  
840 (asterisk) in the mutants (asterisk). Scale bar, 80  $\mu$ m.



- 841 c. Lateral confocal images of zebrafish trunks at 4dpf in control (upper) and *MZprox1a*<sup>-/-</sup>  
842 ;*MZprox1b*<sup>-/-</sup> mutants (lower), showing absent lymphatic vessels (asterisk) but  
843 retained PLs (arrows in lower). Scale bars, 50 μm.
- 844 d. Lateral confocal images of PLs in the horizontal myoseptum at 2, 3 and 4dpf. PLs form  
845 later in *MZprox1a*<sup>-/-</sup>;*MZprox1b*<sup>-/-</sup> mutants and accumulate in the horizontal  
846 myoseptum while the PLs of control embryos emigrate the HM by 4dpf. Scale bars,  
847 50 μm.
- 848 e. Quantification of lymphatic endothelial cell (LEC) number from 4dpf heads control:  
849 n=19, *MZprox1a*<sup>-/-</sup>;*MZprox1b*<sup>-/-</sup> mutants: n=18) and trunks (control: n=29, *MZprox1a*<sup>-/-</sup>  
850 ;*MZprox1b*<sup>-/-</sup> mutants: n=25). Error bars represent mean ± s.e.m.; \*\*\*\* p < 0.0001,  
851 from an unpaired, two-sided t-test.
- 852 f. Quantification of number of PLs per somite in trunks at 2dpf in controls (n=41) and  
853 *MZprox1a*<sup>-/-</sup>;*MZprox1b*<sup>-/-</sup> mutants (n=38), at 3dpf in controls (n=11) and *MZprox1a*<sup>-/-</sup>  
854 ;*MZprox1b*<sup>-/-</sup> mutants (n=10) and at 4dpf in controls (n=29) and *MZprox1a*<sup>-/-</sup>  
855 ;*MZprox1b*<sup>-/-</sup> mutants (n=25). Error bars represent mean ± s.e.m.; \*\*\*\* p < 0.0001, \*  
856 p < 0.05, from an unpaired, two-sided t-test.
- 857 g. Lateral confocal images showing defects in the formation of PLs in mutants upon loss  
858 of *prox1a* compared with controls in the trunk. Genotypes are indicated.
- 859 h. Colour coded list of analysed genotypes abbreviated in (i-k). Each embryo has a  
860 defined genotype for *prox1b* which is represented in colour code as displayed in j.
- 861 i. The number of PLs formed (per somite) at 2dpf in genotypes indicated. Decreasing  
862 gene dosage for *prox1a* and *prox1b* progressively reduced the initial seeding of the  
863 HM by PLs.
- 864 j. The number of cells in sprouts departing the PCV is unchanged in mutants showing  
865 that sprouting occurs normally.
- 866 k. The number of cells in vISVs is unchanged in mutants indicating no effect on the  
867 venous endothelium.

868

869 LL, lymphatic loop. OLV, otholitic lymphatic vessel. LFL, lateral facial lymphatic vessel. MFL,  
870 medial facial lymphatic vessel. LBA, lymphatic branchial arches. DLLV, dorsal longitudinal  
871 lymphatic vessel. PL, parachordal LEC. ISLV, intersomitic lymphatic vessel. TD, thoracic duct.  
872 DA, dorsal aorta. PCV, posterior cardinal vein.



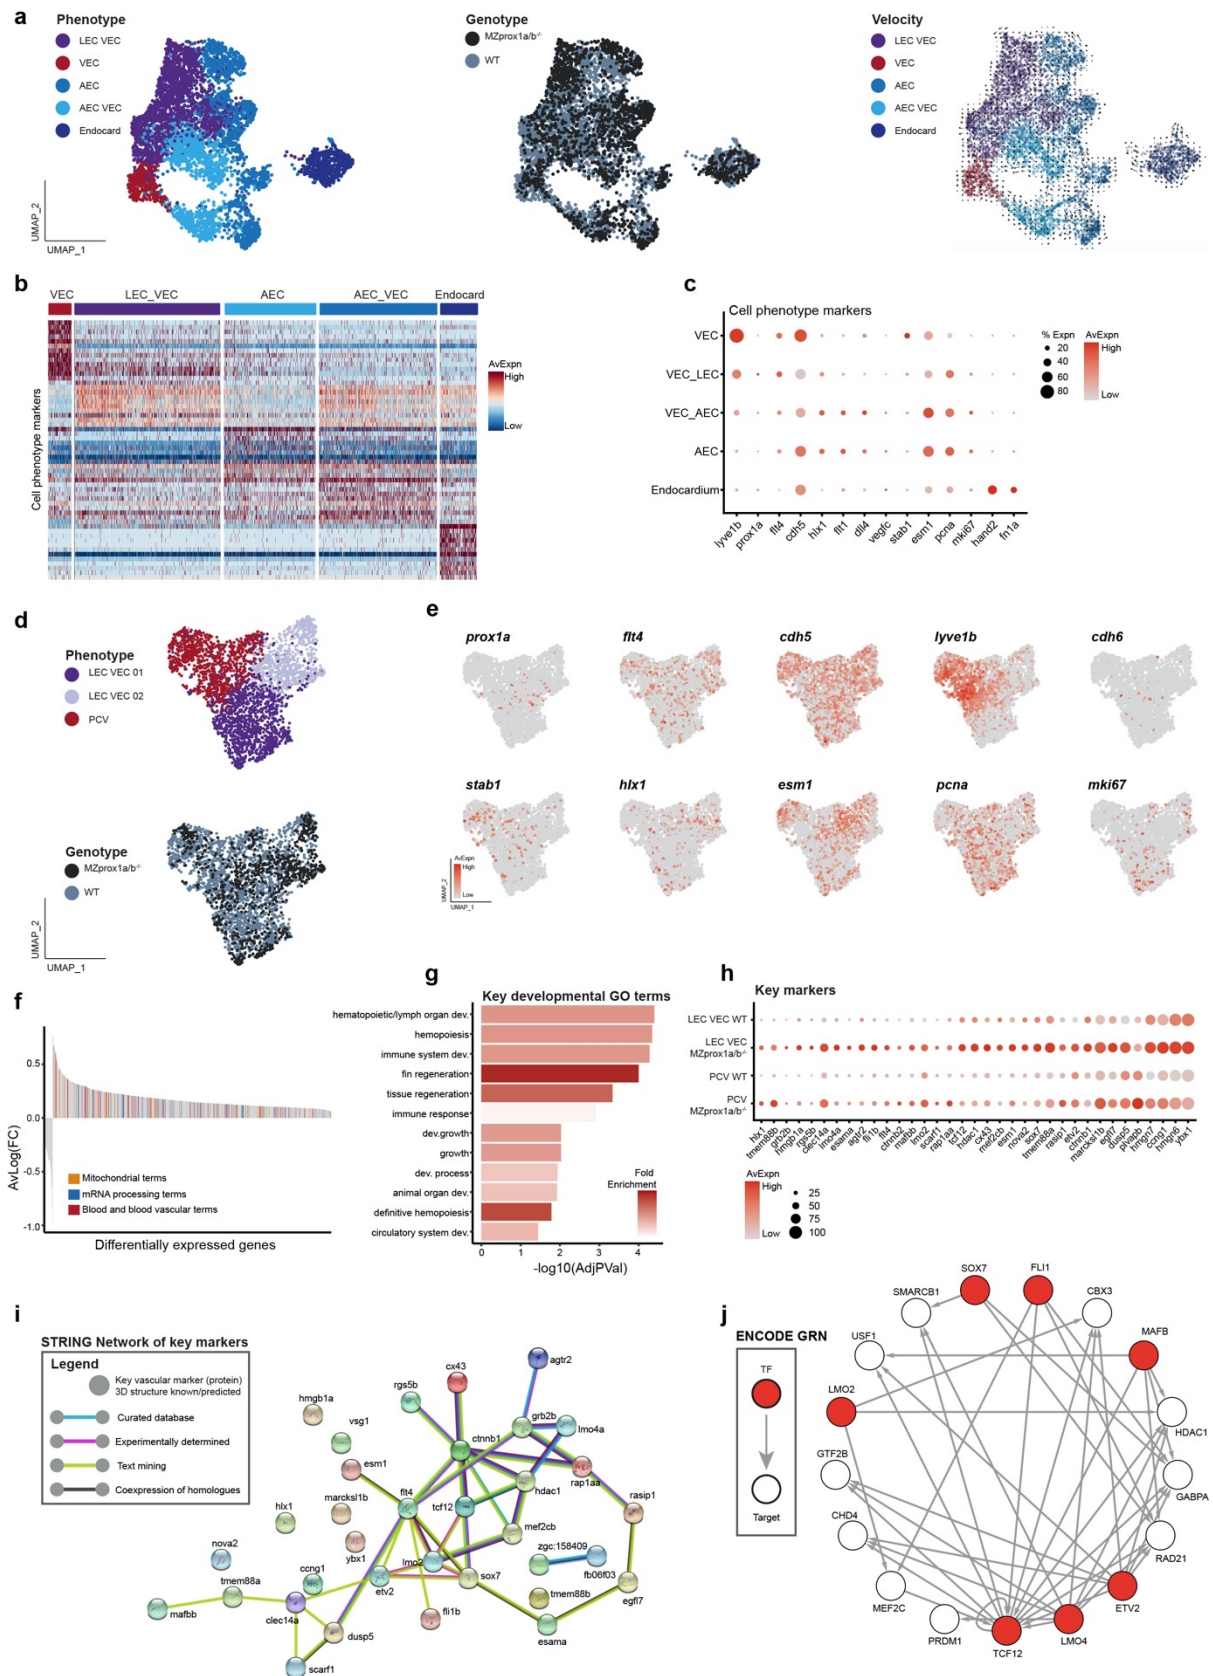

874

875 **Figure 7: Single cell profiling of maternal zygotic *prox1a;prox1b* double mutants reveals that**

876 **Prox1 homologues initially suppress gene expression to drive a fate transition**

- 877 a. UMAP visualisation of endocardial, venous and arterial endothelial cells (Level 02  
878 n=5,347) coloured according to predicted cell phenotype (left), genotype (middle) and  
879 RNA-velocity (right).
- 880 b. Heatmap displaying expression of phenotype specific genes defined using differential  
881 expression analysis. Columns are cells grouped by phenotype assignment, rows are  
882 genes, and colour indicates the average level of expression.
- 883 c. Dot plot indicating expression of key markers used to define cell phenotype. Colour  
884 scale represents average SCT-normalised expression and point size represents  
885 percentage of cells expressing gene.
- 886 d. UMAP visualisation of venous endothelial cells (Level 03 n=2,747) coloured according  
887 to predicted cell phenotype (top) and genotype (bottom).
- 888 e. UMAP visualisation of key marker gene expression. Colour scale represents SCT-  
889 normalised expression.
- 890 f. Bar plot indicating average log fold change of n=1,186 significantly different genes  
891 between all *MZprox1a/b*<sup>-/-</sup> and WT venous endothelial cells (LEC VEC 01, LEC VEC 02  
892 and PCV combined) at 40hpf (Wilcoxin Rank Sum *adjusted p value* < 0.05). Colour  
893 indicates genes associated with one or more mitochondrial, mRNA processing and  
894 blood and blood vascular GO terms.
- 895 g. Bar plot summarizing GO BP analysis of the n=1,137 genes upregulated in the  
896 *MZprox1a/b*<sup>-/-</sup> venous endothelial cells. Y-axis represents enriched GO BP term, x-axis  
897 represents the  $-\log_{10}(\text{adjusted } p \text{ value})$  and bars are coloured according to fold  
898 enrichment.
- 899 h. Dot plot of n=36 key blood vascular markers upregulated in the *MZprox1a/b*<sup>-/-</sup> venous  
900 endothelial cells, indicating genotype specific expression in LEC VEC and PCV cell  
901 phenotypes. Colour scale represents average SCT-normalised expression and point  
902 size represents percentage of cells expressing gene.
- 903 i. STRING analysis of n=36 key blood vascular markers upregulated in the *MZprox1a/b*<sup>-/-</sup>  
904 venous endothelial cells.
- 905 j. Degree-sorted gene regulatory network displaying known TF binding at n=1,137 genes  
906 upregulated in the *MZprox1a/b*<sup>-/-</sup> venous endothelial cells. TFs are represented by red  
907 circles (nodes), target genes by white circles (nodes), and known binding of TF to

908 target by a grey arrow (edges). Nodes with a larger number of edges are more highly  
909 connected (bottom right), and nodes with fewer edges are less connected (top left).  
910

911 **EXTENDED DATA FIGURES AND FIGURE LEGENDS**

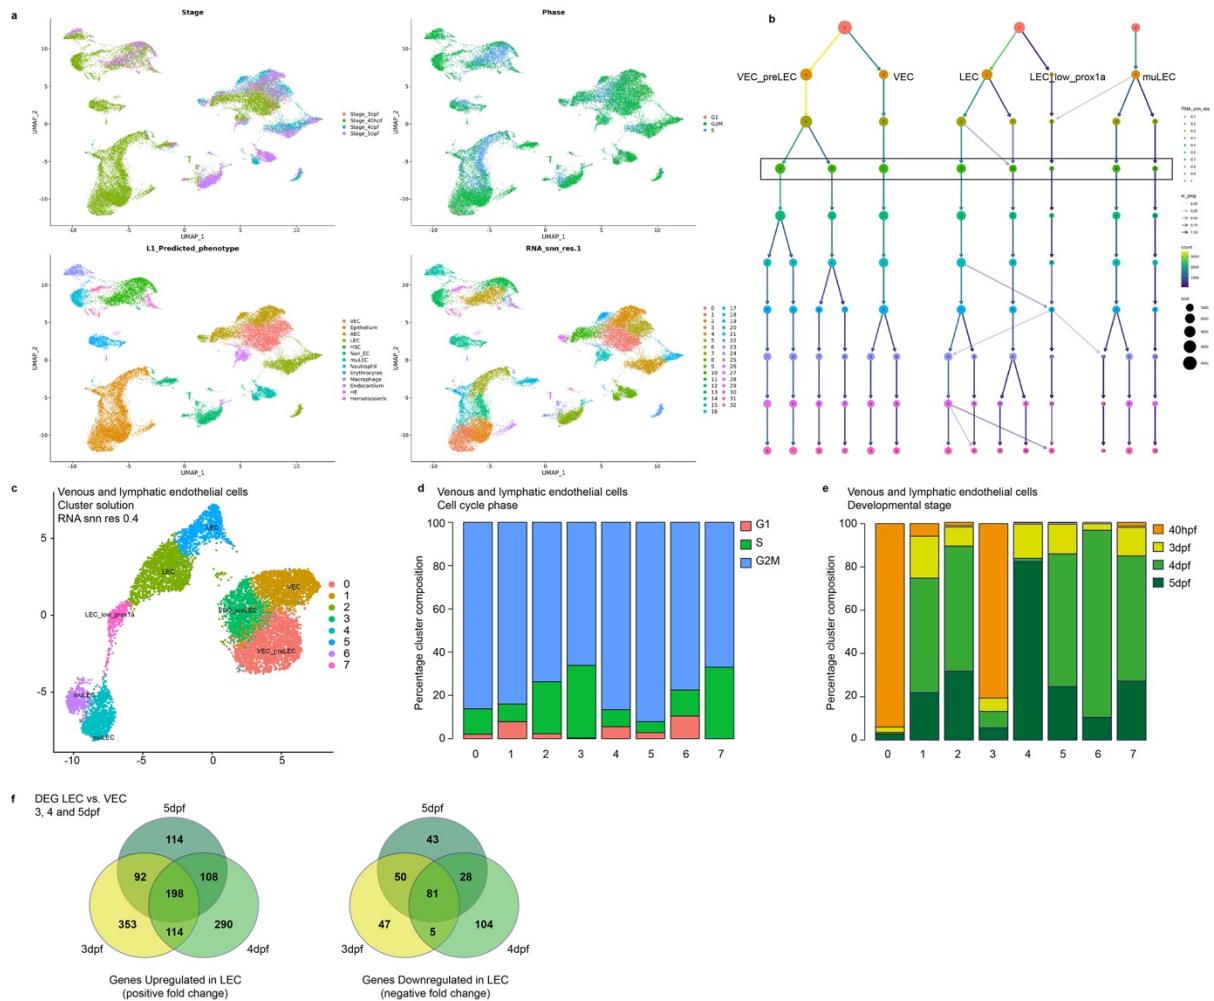

912

913 **Extended data Fig 1: Full dataset and analysis for data in Fig 1.**

914 **a.** UMAP visualization of n=35634 endothelial cells sequenced for the single cell atlas of  
 915 lymphangiogenesis (n=6 samples; see also **Extended data table 1a** for markers used  
 916 to identify clusters) coloured according to developmental stage (top left), cell cycle  
 917 phase (top right), predicted cell phenotype (bottom left), and cluster solution (RNA-  
 918 snn-res.1).

919 **b.** Clustree analysis demonstrating the relationship between different cluster resolutions  
 920 for the n=9771 venous and lymphatic endothelial cells in Figure 1a. Resolution 0.4  
 921 (boxed) was used for all downstream analyses.

922 **c.** UMAP visualization of cluster resolution 0.4 (as appears in **Fig 1**).

923 **d.** Stacked bar plot of resolution 0.4 cluster composition cell cycle phase.

924 **e.** Stacked bar plot of resolution 0.4 cluster composition developmental stage.

925        **f.** Venn diagram of significant genes commonly upregulated in LEC compared to VEC at  
926            3, 4 and 5dpf.  
927

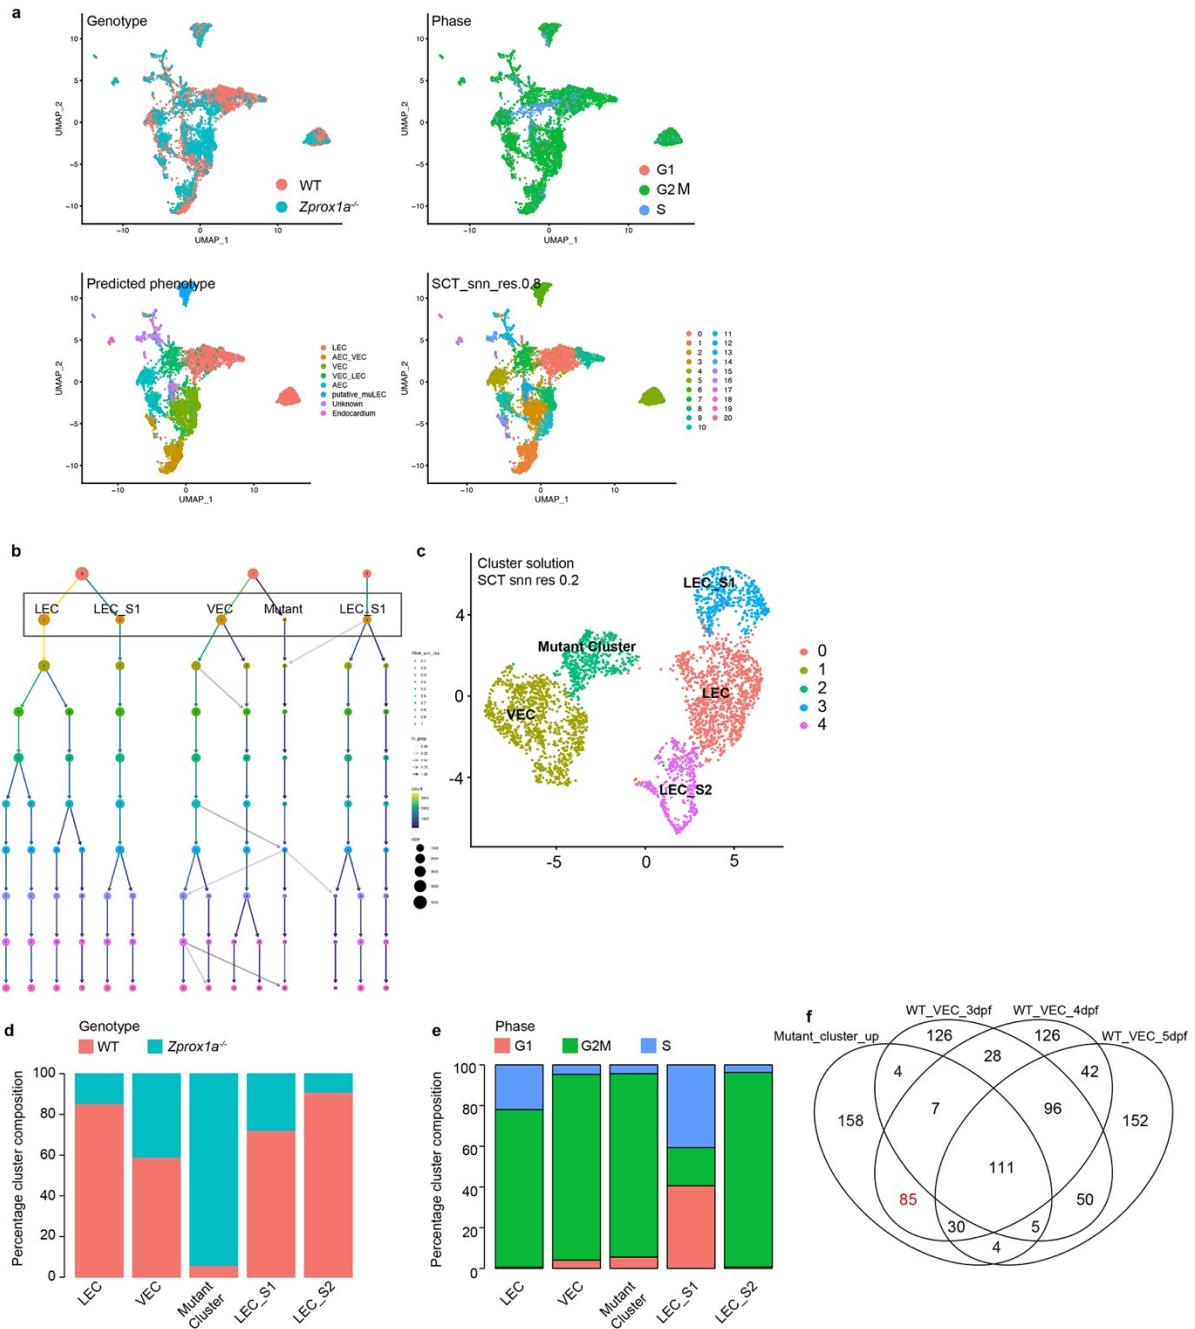

928

929 **Extended data Fig 2: Full dataset and analysis for data in Fig 3.**

930 **a.** UMAP visualization of  $n=8075$  endothelial cells sequenced comparing  
 931 lymphangiogenesis in WT and *Zprox1a* mutants at 4dpf ( $n=2$  samples; see also  
 932 **Extended data table 2a** for markers used to identify clusters) coloured according to  
 933 developmental stage (top left), cell cycle phase (top right), predicted cell phenotype  
 934 (bottom left), and cluster solution (SCT-snn-res.8)



- 935       **b.** Clustree analysis demonstrating the relationship between different cluster resolutions  
936           for the n=3063 venous and lymphatic endothelial cells in **Figure 3a**. Resolution 0.2  
937           (boxed) was used for all downstream analyses.
- 938       **c.** UMAP visualization of cluster resolution 0.2
- 939       **d.** Stacked bar plot of resolution 0.2 cluster composition genotype
- 940       **e.** Stacked bar plot of resolution 0.2 cluster composition cell cycle phase
- 941       **f.** Venn diagram indicates the overlap between genes significantly upregulated in VEC  
942           compared to LEC at each developmental stage of the single cell atlas, and those  
943           upregulated in the *Zprox1a*<sup>-/-</sup> Mutant Cluster at 4dpf compared to WT LECs. N=85  
944           genes (coloured red) are uniquely associated with the Mutant Cluster and WT VEC at  
945           4dpf, compared to N=4 genes in WT VEC at 3 and 5dpf.
- 946

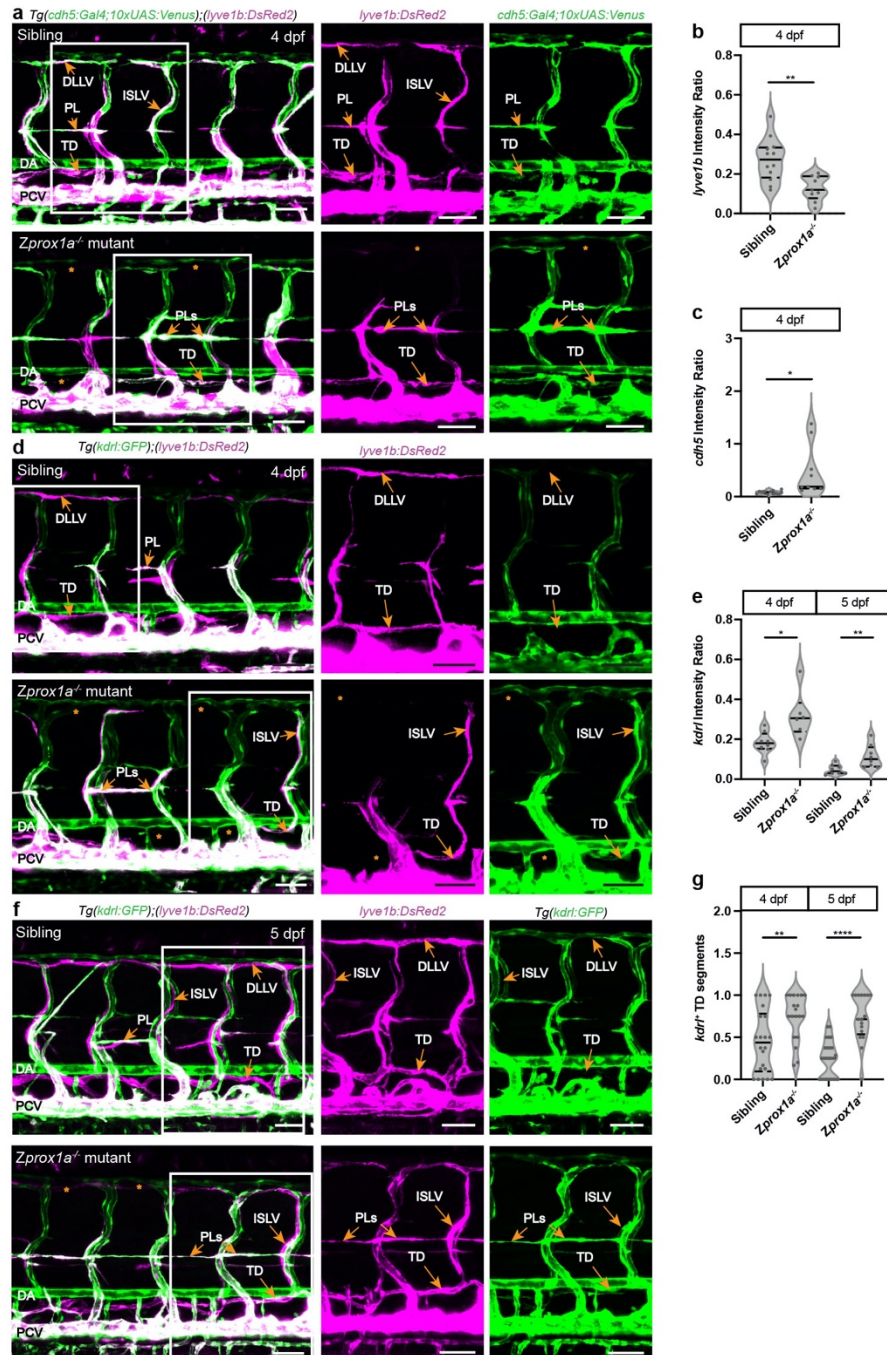

947

948 **Extended data Fig 3: Additional phenotypic analysis of blood vascular markers in *Zprox1a<sup>-/-</sup>***  
 949 **mutants associated with Fig 3**

950 **a.** Lateral confocal images of zebrafish trunks at 4 dpf showing *cdh5* expression (green)  
 951 and *lyve1b* expression in lymphatic vessels (magenta) in control (upper) and *Zprox1a*  
 952 mutant embryos (lower). Transgenic lines are indicated. Scale bar, 50  $\mu$ m.

953 **b.** Quantification of *lyve1b* expression intensity in the TD relative to the PCV in sibling  
 954 and *Zprox1a* mutant embryos at 4 dpf.

- 955        **c.** Quantification of *cdh5* expression intensity in the TD relative to the DA in sibling and  
956            *Zprox1a* mutant embryos at 4dpf.
- 957        **d.** Lateral confocal images of zebrafish trunks at 4dpf showing *kdrl* expression (green)  
958            and *lyve1b* expression in lymphatic vessels (magenta) in control (upper) and *Zprox1a*  
959            mutants (lower). Transgenic lines are indicated. Scale bars, 50  $\mu$ m.
- 960        **e.** Quantification of *kdrl* expression intensity in the TD relative to the DA in sibling and  
961            *Zprox1a* mutant embryos at 4dpf and 5dpf (upper).
- 962        **f.** Lateral confocal images of zebrafish trunks at 5dpf showing *kdrl* expression (green)  
963            and *lyve1b* expression in lymphatic vessels (magenta) in control (upper) and *Zprox1a*  
964            mutants (lower). Transgenic lines are indicated. Scale bars, 50  $\mu$ m.
- 965        **g.** Quantification of the number of TD segments displaying *kdrl* expression in *Zprox1a*  
966            mutant embryos at 4dpf and 5dpf (lower).
- 967    DLLV, dorsal longitudinal lymphatic vessel. ISLV, intersomitic lymphatic vessel. TD, thoracic  
968    duct. DA, Dorsal aorta. PCV, posterior cardinal vein. vISV, venous intersegmental vessel. PL,  
969    Parachoral lymphatic endothelial cells.
- 970

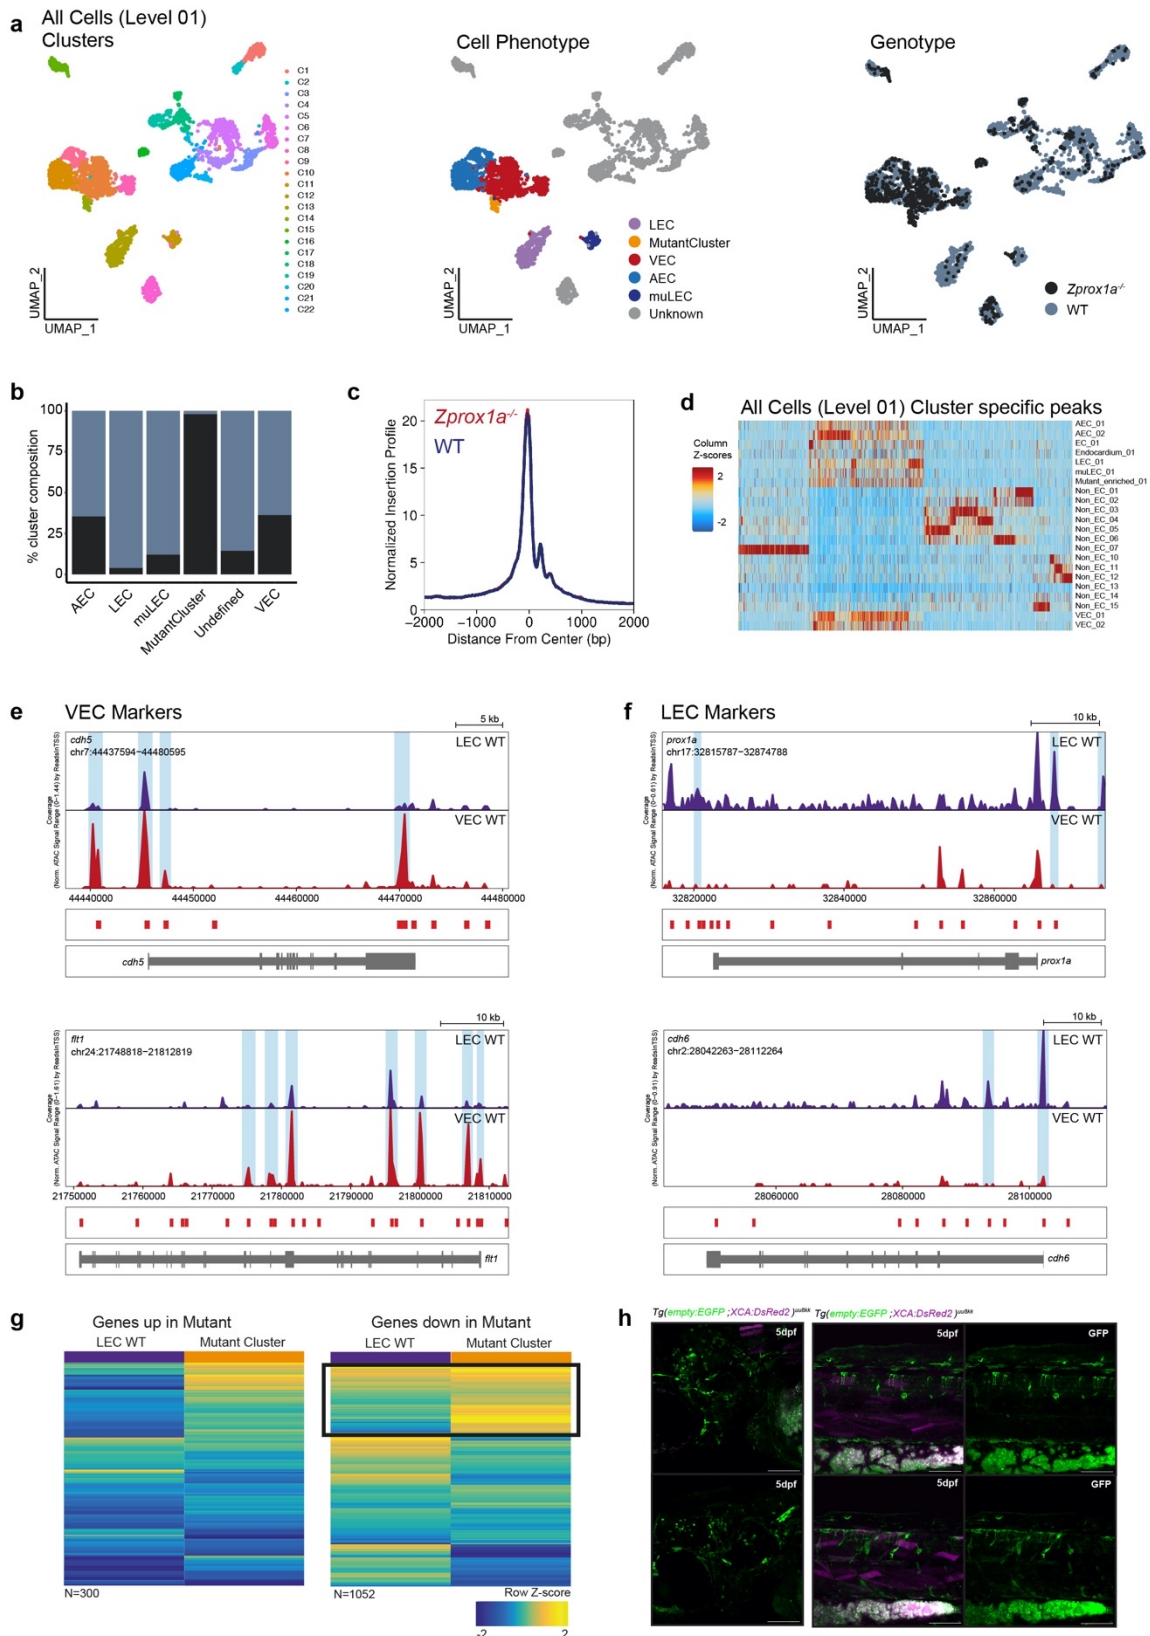

971

972 **Extended data Fig 4: Additional data and analysis for data in Fig 4.**

973 **a.** UMAP visualization of n=3,731 single nuclei ATAC-seq data comparing

974 lymphangiogenesis in WT and *Zprox1a* mutants at 4dpf. Nuclei coloured according to

- 975 cluster (Res-0.8, left), predicted cell phenotype (middle) and genotype (right). Cell  
976 phenotype was predicted based on accessibility changes at the genes defined in  
977 **Extended data table 3a.**
- 978 **b.** Stacked bar plot indicating the genotype composition of nuclei captured per cell type.
- 979 **c.** Density plot indicating the majority of snATAC-seq peaks fall around the TSS. Y-axis  
980 represents distance from TSS (bp) and y-axis represents normalised Tn5 insertion  
981 profile.
- 982 **d.** Heatmap of cluster specific accessible peaks for all cell clusters. Colour reflects a  
983 column-wise Z-score, each row represents a cluster defined in **Extended Data Fig. 4a**,  
984 columns are peaks.
- 985 **e.** Genome accessibility track of key VEC markers *cdh5* (top) and *flt1* (bottom) indicating  
986 these genes are more accessible in WT VEC than WT LEC cell phenotypes. Red bars  
987 represent peaks in the reproducible peak set from snATAC-seq. DAP between WT VECs  
988 and WT LECs (Wilcoxon Rank Sum, *FDR* < 0.05) are highlighted blue.
- 989 **f.** Genome accessibility track of key LEC markers *prox1a* (top) and *cdh6* (bottom)  
990 indicating these genes are more accessible in WT LEC than WT VEC cell phenotypes.  
991 Red bars represent peaks in the reproducible peak set from snATAC-seq. DAP between  
992 WT LECs and WT VECs (Wilcoxon Rank Sum, *FDR* < 0.05) are highlighted blue.
- 993 **g.** Heatmaps of accessibility (gene score) for DEG (**Fig 3f**) upregulated (left, n=300  
994 mapped genes) and downregulated (right, n=1,052 mapped genes) in the Mutant  
995 Cluster compared to WT LECs. Colour indicates row-wise Z-score, each row represents  
996 a differentially expressed gene in scRNA-seq data, columns are snATAC-seq clusters.  
997 Boxed genes downregulated in Mutant display more permissive chromatin in Mutant  
998 than WT LEC, showing that mutant cluster cells display a unique chromatin state at  
999 many genes.
- 1000 **h.** Confocal projections of zebrafish head (left) labelled with *Tg(empty:EGFP;*  
1001 *XCA:DsRed2)* at 5 dpf, showing GFP expression in neuronal tissues. Confocal  
1002 projections of zebrafish trunk (right) labelled with *Tg(empty:EGFP; XCA:DsRed2)* at 5  
1003 dpf, showing GFP expression in neuronal tissues. All scale bars = 100µm.
- 1004

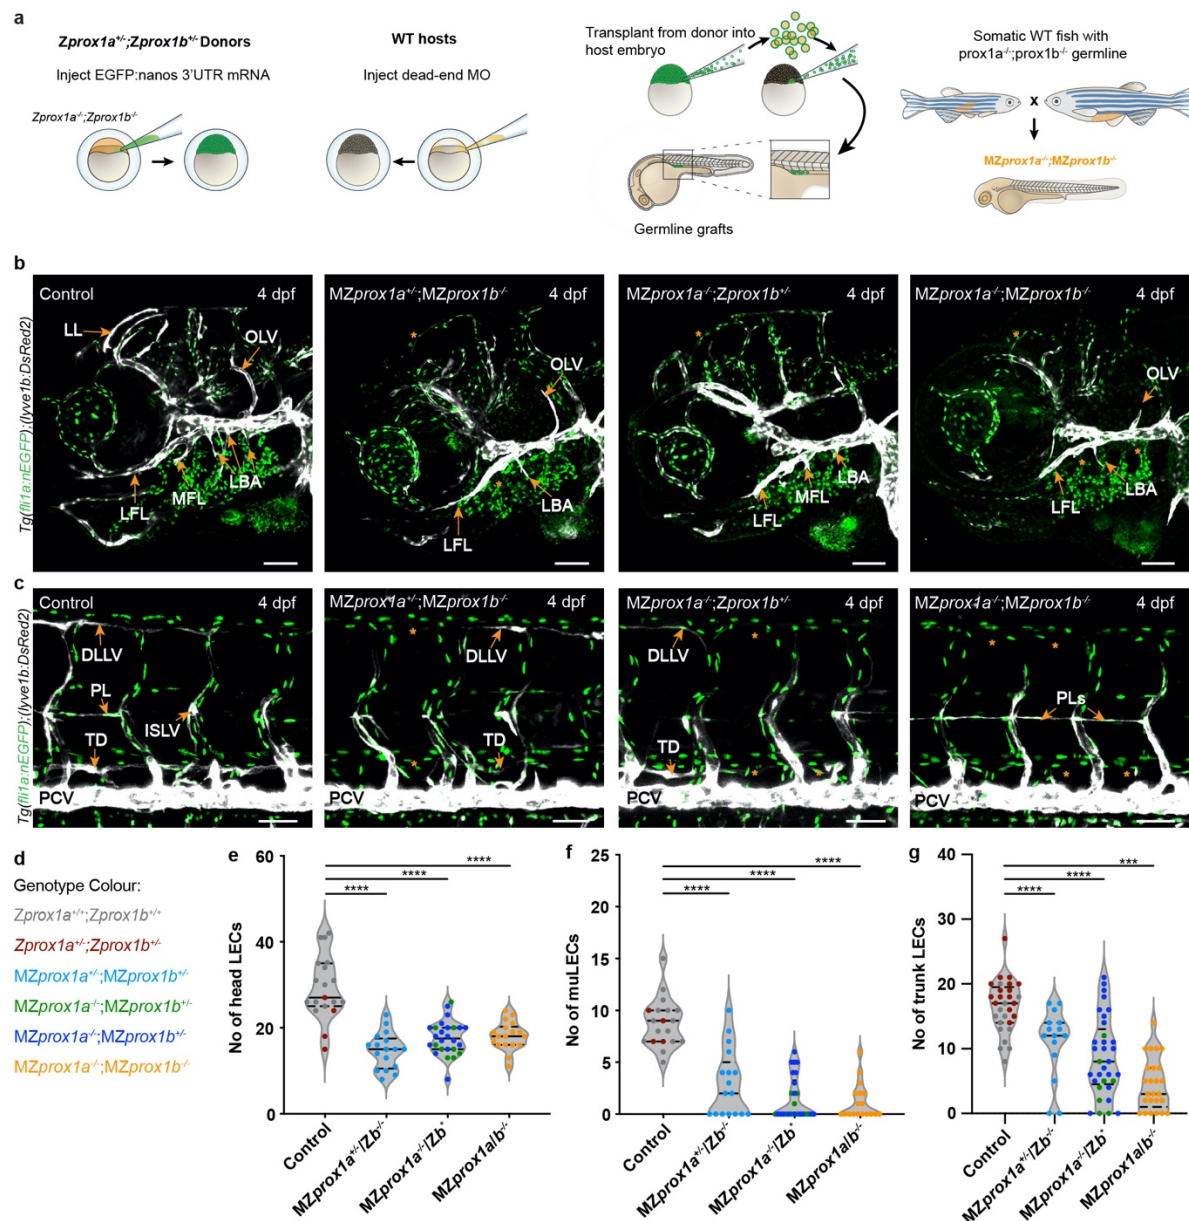

1005

1006

**Extended data Fig 5: Additional phenotypic analysis of  $MZprox1a^{-/-}; MZprox1b^{-/-}$  mutants associated with Fig 6**

1008

**a.** Schematic explanation of the germline replacement transplantation method used to generate  $MZprox1a^{-/-}; MZprox1b^{-/-}$  mutants.

1010

**b-c.** Lateral confocal images showing vascular defects in control and mutant in the craniofacial (**b**) and trunk (**c**) regions of the larvae at 4 dpf. Genotypes and transgenic labels are indicated.  $MZprox1a^{-/-}$  and  $MZprox1a^{+/-}$ ,  $MZprox1b^{-/-}$  animals both showed a strong loss of lymphatic vessels in craniofacial and trunk regions. The  $MZprox1a^{-/-}$ ,  $MZprox1b^{-/-}$  mutants showed a robust loss of craniofacial vessels equivalent to the other mutant phenotypes but a more severe loss of trunk lymphatics and an accumulation of PLs in the HM.

1015

1016

1017 **d.** Genotypes that are shown in the quantification. Colour codes are used to identify  
1018 individual embryonic genotypes in the dot plots showing quantification in **e-g**.

1019 **e.** Quantification of the number of craniofacial (head) LECs within facial lymphatic  
1020 vessels showing evidence for contributions from *prox1a* and *prox1b*.

1021 **f.** Quantification of the number of mural LECs (muLECs) showing a major role for *prox1a*  
1022 and a role for *prox1b* in muLEC development.

1023 **g.** Quantification of the number of trunk LECs within vessels showing a dominant role for  
1024 *prox1a* in trunk lymphangiogenesis.

1025 Z, zygotic; MZ, maternal and zygotic; HM, horizontal myoseptum; LL, lymphatic loop; OLV,  
1026 otholitic lymphatic vessel; LFL, lateral facial lymphatic vessel; MFL, medial facial lymphatic  
1027 vessel; LBA, lymphatic branchial arches; DLLV, dorsal longitudinal lymphatic vessel; PL,  
1028 parachordal LEC; ISLV, intersomitic lymphatic vessel; TD, thoracic duct; DA, dorsal aorta; PCV,  
1029 posterior cardinal vein.

1030

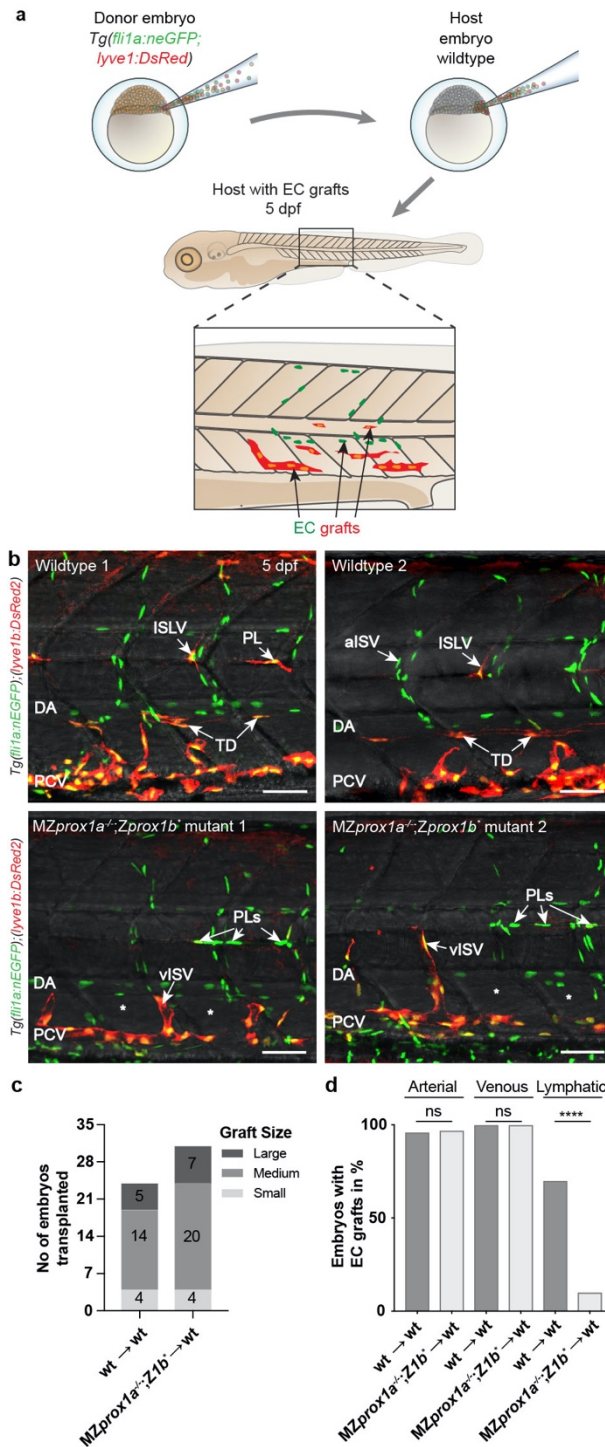

1031

1032 **Extended data Fig 6: Embryonic transplantation data demonstrating endothelial cell**  
 1033 **autonomy of *prox1a* maternal zygotic mutant phenotype associated with Fig 6.**

1034 **a.** Schematic showing the endothelial cell transplantation approach used to test cell  
 1035 autonomy for the vascular phenotypes seen in *MZprox1a* mutants. Cell identities were  
 1036 traced following transplantation in unlabelled host embryos using expression of the  
 1037 pan-endothelial marker *fli1a* and venous/lymphatic marker *lyve1b* (indicated).



- 1038       **b.** Examples of 5dpf wildtype hosts engrafted with wildtype donor cells (upper) that  
1039       contribute to arteries (aISVs, DA), veins (PCV, vISVs) and lymphatic vessels (TD, ISLVs)  
1040       and examples of wildtype embryos engrafted with *MZprox1a* mutant cells  
1041       contributing arteries (aISVs, DA) and veins (vISV, PCV) but not lymphatic vessels. Note  
1042       the PL accumulation in the horizontal myoseptum..
- 1043       **c.** The number of embryos imaged and graft sizes scored post-tranplantation. As the  
1044       contribution to the different EC types is affected by the graft size, we analysed grafts  
1045       of comparable sizes and position from wildtype and mutant embryos. Grafts were  
1046       categorised as large, medium or small. Small (spanning 1-2 somites), medium  
1047       (spanning 2-3 somites) and large grafts (spanning 4-5 somites). The number of ECs  
1048       contributing to each EC type was scored at single cell resolution and the percentage  
1049       of grafts with a contribution to each lineage calculated accordingly. The numbers  
1050       within the different graft groups indicate the number of analysed embryos within that  
1051       group.
- 1052       **d.** The percentage of embryos with vascular grafts that display contributions to arteries,  
1053       veins and lymphatics. *MZprox1a*<sup>-/-</sup> mutant cells contribute to arteries and veins but  
1054       showed a near complete loss of contribution to lymphatics. The size of the grafts did  
1055       not influence the outcome. *Z1b*\* indicates a mixed *prox1b* background.  $p < 0.0001$   
1056       from an unpaired, two-sided t-test.
- 1057       DA, dorsal aorta. PCV, posterior cardinal vein. PL, parachordal LEC. TD, thoracic duct. aISV,  
1058       arterial intersegmental vessel. vISV, venous intersegmental vessel. ISLV, intersegmental  
1059       lymphatic vessel.
- 1060

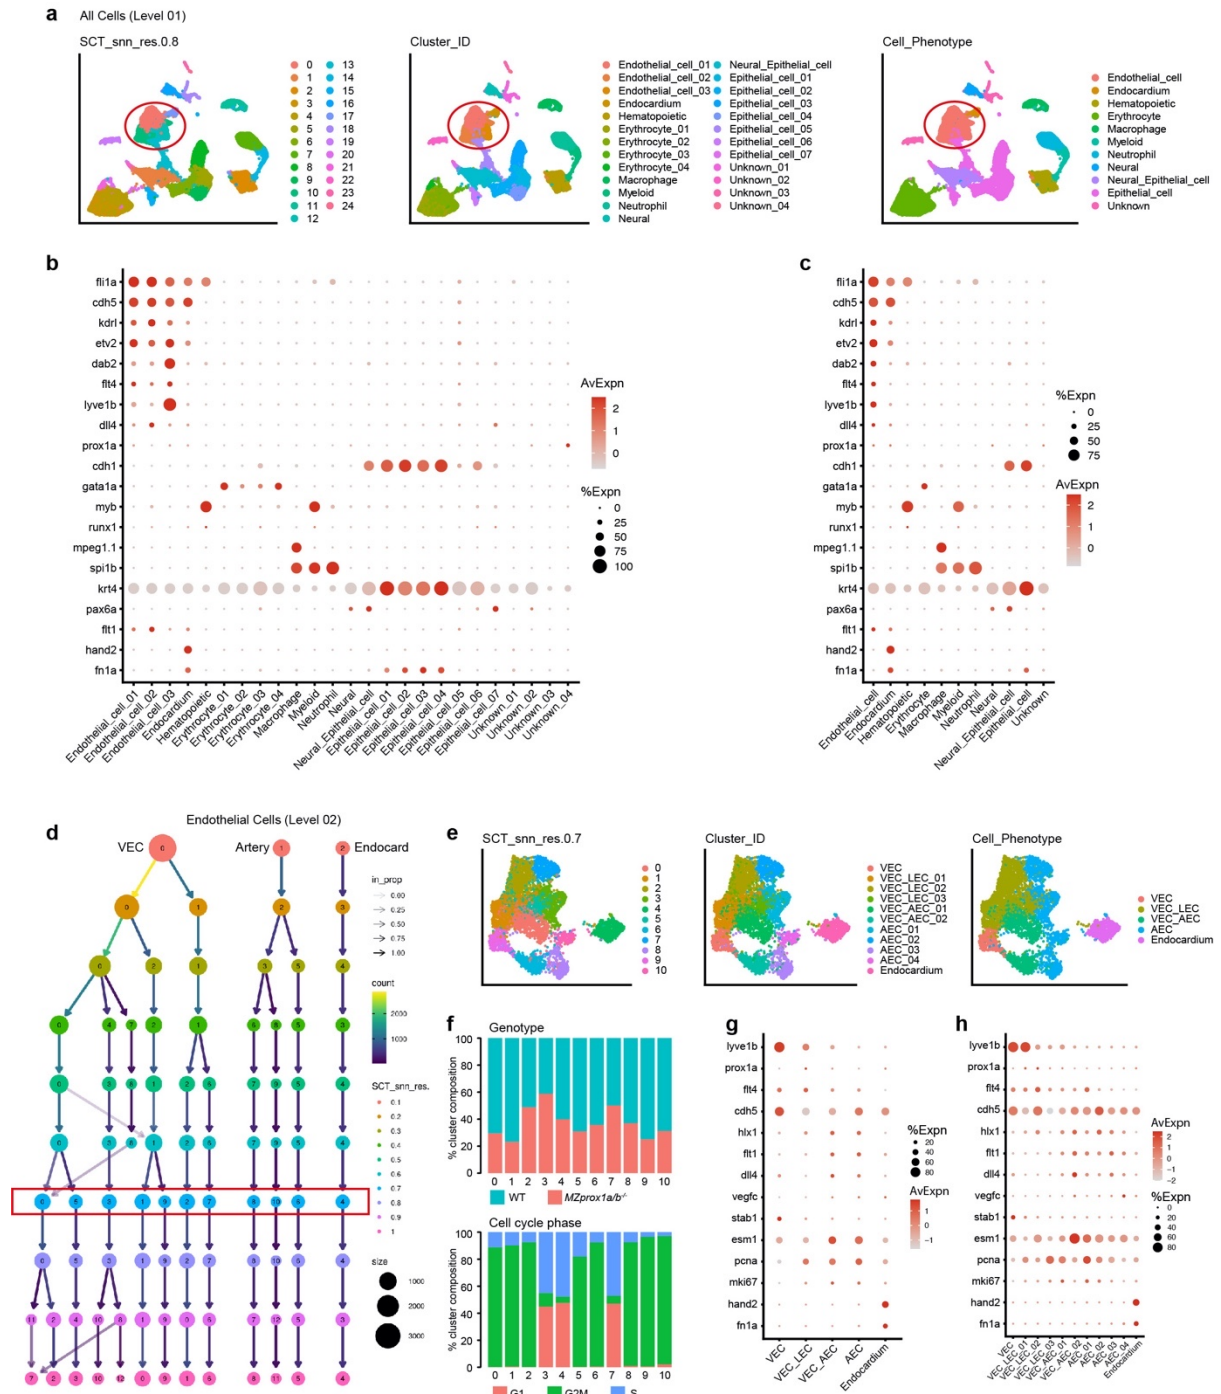

1061  
1062

**Extended data Fig 7: Additional data and analysis for data in Fig 7.**

1063  
1064  
1065  
1066  
1067  
1068

**a.** UMAP visualization of n=26,289 endothelial cells sequenced comparing lymphangiogenesis in WT and *MZprox1a/b* mutants at 40hpf (n=4 samples; see also **Extended data table 5a** for markers used to identify clusters) coloured according to cluster solution (SCT-snn-res.8, left), predicted phenotype per cluster (middle), and predicted cell phenotype (right). Endothelial cells selected for further analysis are indicated by a red circle.

- 1069       **b.** Dot plot summarizing the scRNA-seq expression level of n=20 key genes used to  
1070       predict cell phenotypes of each cluster in the complete dataset (Level 01), for each  
1071       cluster defined in **Extended Data Fig. 7a** (SCT-snn-res.8). The size of the dot  
1072       represents the proportion of cells that express the markers in the cluster, and colour  
1073       represents SCT-normalised expression.
- 1074       **c.** Dot plot summarizing the scRNA-seq expression level of n=20 key genes used to  
1075       predict cell phenotype in the complete dataset. The size of the dot represents the  
1076       proportion of cells that express the markers in the cluster, and colour represents SCT-  
1077       normalised expression.
- 1078       **d.** Clustree analysis demonstrating the relationship between different cluster resolutions  
1079       for the n=5,347 endocardial, venous and arterial endothelial cells in **Fig. 7a** and  
1080       **Extended Data Fig. 7a** (Level 02). Cluster resolution SCT\_snn\_0.7 (boxed) was selected  
1081       for all downstream analyses.
- 1082       **e.** UMAP visualization of cluster resolution SCT\_snn\_0.7 (left), predicted phenotype of  
1083       each cluster (middle) and phenotypic group (right).
- 1084       **f.** Stacked bar plot of cluster resolution SCT\_snn\_0.7 cluster composition genotype (top)  
1085       and cell cycle phase (bottom).
- 1086       **g.** Dot plot summarizing the scRNA-seq expression level of n=14 key genes used to  
1087       predict cell phenotype in the endothelial cell populations (Level 02, n=5,347 cells).  
1088       The size of the dot represents the proportion of cells that express the markers in the  
1089       cluster, and colour represents SCT-normalised expression.

1090  
1091  
1092  
1093  
1094  
1095

## References

- 1096    1       Oliver, G., Kipnis, J., Randolph, G. J. & Harvey, N. L. The Lymphatic Vasculature in  
1097       the 21(st) Century: Novel Functional Roles in Homeostasis and Disease. *Cell* **182**,  
1098       270-296, doi:10.1016/j.cell.2020.06.039 (2020).
- 1099    2       Koltowska, K., Betterman, K. L., Harvey, N. L. & Hogan, B. M. Getting out and  
1100       about: the emergence and morphogenesis of the vertebrate lymphatic vasculature.  
1101       *Development* **140**, 1857-1870, doi:10.1242/dev.089565 (2013).
- 1102    3       Baek, S. *et al.* The Alternative Splicing Regulator Nova2 Constrains Vascular Erk  
1103       Signaling to Limit Specification of the Lymphatic Lineage. *Dev Cell* **49**, 279-292  
1104       e275, doi:10.1016/j.devcel.2019.03.017 (2019).

- 1105 4 Koltowska, K. *et al.* Vegfc Regulates Bipotential Precursor Division and Prox1  
1106 Expression to Promote Lymphatic Identity in Zebrafish. *Cell Rep* **13**, 1828-1841,  
1107 doi:10.1016/j.celrep.2015.10.055 (2015).
- 1108 5 Deng, Y., Atri, D., Eichmann, A. & Simons, M. Endothelial ERK signaling controls  
1109 lymphatic fate specification. *The Journal of clinical investigation* **123**, 1202-1215,  
1110 doi:10.1172/JCI63034 (2013).
- 1111 6 Shin, M. *et al.* Vegfc acts through ERK to induce sprouting and differentiation of  
1112 trunk lymphatic progenitors. *Development* **143**, 3785-3795, doi:10.1242/dev.137901  
1113 (2016).
- 1114 7 Srinivasan, R. S. *et al.* The Prox1-Vegfr3 feedback loop maintains the identity and the  
1115 number of lymphatic endothelial cell progenitors. *Genes Dev* **28**, 2175-2187,  
1116 doi:10.1101/gad.216226.113 (2014).
- 1117 8 Oliver, G. & Srinivasan, R. S. Endothelial cell plasticity: how to become and remain a  
1118 lymphatic endothelial cell. *Development* **137**, 363-372, doi:10.1242/dev.035360  
1119 (2010).
- 1120 9 Wigle, J. T. & Oliver, G. Prox1 function is required for the development of the  
1121 murine lymphatic system. *Cell* **98**, 769-778, doi:10.1016/s0092-8674(00)81511-1  
1122 (1999).
- 1123 10 Hagerling, R. *et al.* A novel multistep mechanism for initial lymphangiogenesis in  
1124 mouse embryos based on ultramicroscopy. *EMBO J* **32**, 629-644,  
1125 doi:10.1038/emboj.2012.340 (2013).
- 1126 11 Klotz, L. *et al.* Cardiac lymphatics are heterogeneous in origin and respond to injury.  
1127 *Nature* **522**, 62-67, doi:10.1038/nature14483 (2015).
- 1128 12 Martinez-Corral, I. *et al.* Nonvenous origin of dermal lymphatic vasculature. *Circ Res*  
1129 **116**, 1649-1654, doi:10.1161/CIRCRESAHA.116.306170 (2015).
- 1130 13 Stanczuk, L. *et al.* cKit Lineage Hemogenic Endothelium-Derived Cells Contribute to  
1131 Mesenteric Lymphatic Vessels. *Cell Rep* **10**, 1708-1721,  
1132 doi:10.1016/j.celrep.2015.02.026 (2015).
- 1133 14 Srinivasan, R. S. *et al.* Lineage tracing demonstrates the venous origin of the  
1134 mammalian lymphatic vasculature. *Genes Dev* **21**, 2422-2432,  
1135 doi:10.1101/gad.1588407 (2007).
- 1136 15 Srinivasan, R. S. *et al.* The nuclear hormone receptor Coup-TFII is required for the  
1137 initiation and early maintenance of Prox1 expression in lymphatic endothelial cells.  
1138 *Genes Dev* **24**, 696-707, doi:10.1101/gad.1859310 (2010).
- 1139 16 Yang, Y. *et al.* Lymphatic endothelial progenitors bud from the cardinal vein and  
1140 intersomitic vessels in mammalian embryos. *Blood* **120**, 2340-2348,  
1141 doi:10.1182/blood-2012-05-428607 (2012).
- 1142 17 Stone, O. A. & Stainier, D. Y. R. Paraxial Mesoderm Is the Major Source of  
1143 Lymphatic Endothelium. *Dev Cell* **50**, 247-255 e243,  
1144 doi:10.1016/j.devcel.2019.04.034 (2019).
- 1145 18 Johnson, N. C. *et al.* Lymphatic endothelial cell identity is reversible and its  
1146 maintenance requires Prox1 activity. *Genes Dev* **22**, 3282-3291,  
1147 doi:10.1101/gad.1727208 (2008).
- 1148 19 Tao, S. *et al.* Zebrafish prox1b mutants develop a lymphatic vasculature, and prox1b  
1149 does not specifically mark lymphatic endothelial cells. *PLoS One* **6**, e28934,  
1150 doi:10.1371/journal.pone.0028934 (2011).
- 1151 20 van Impel, A. *et al.* Divergence of zebrafish and mouse lymphatic cell fate  
1152 specification pathways. *Development* **141**, 1228-1238, doi:10.1242/dev.105031  
1153 (2014).

- 1154 21 Hogan, B. M. *et al.* Ccbe1 is required for embryonic lymphangiogenesis and venous  
1155 sprouting. *Nat Genet* **41**, 396-398, doi:10.1038/ng.321 (2009).
- 1156 22 Yaniv, K. *et al.* Live imaging of lymphatic development in the zebrafish. *Nat Med* **12**,  
1157 711-716, doi:10.1038/nm1427 (2006).
- 1158 23 Eng, T. C. *et al.* Zebrafish facial lymphatics develop through sequential addition of  
1159 venous and non-venous progenitors. *EMBO Rep* **20**, doi:10.15252/embr.201847079  
1160 (2019).
- 1161 24 Okuda, K. S. *et al.* lyve1 expression reveals novel lymphatic vessels and new  
1162 mechanisms for lymphatic vessel development in zebrafish. *Development* **139**, 2381-  
1163 2391, doi:10.1242/dev.077701 (2012).
- 1164 25 Bussmann, J. *et al.* Arteries provide essential guidance cues for lymphatic endothelial  
1165 cells in the zebrafish trunk. *Development* **137**, 2653-2657, doi:10.1242/dev.048207  
1166 (2010).
- 1167 26 Cha, Y. R. *et al.* Chemokine signaling directs trunk lymphatic network formation  
1168 along the preexisting blood vasculature. *Dev Cell* **22**, 824-836,  
1169 doi:10.1016/j.devcel.2012.01.011 (2012).
- 1170 27 Jung, H. M. *et al.* Development of the larval lymphatic system in zebrafish.  
1171 *Development* **144**, 2070-2081, doi:10.1242/dev.145755 (2017).
- 1172 28 Bower, N. I. *et al.* Mural lymphatic endothelial cells regulate meningeal angiogenesis  
1173 in the zebrafish. *Nat Neurosci* **20**, 774-783, doi:10.1038/nn.4558 (2017).
- 1174 29 van Lessen, M. *et al.* Intracellular uptake of macromolecules by brain lymphatic  
1175 endothelial cells during zebrafish embryonic development. *Elife* **6**,  
1176 doi:10.7554/eLife.25932 (2017).
- 1177 30 Venero Galanternik, M. *et al.* A novel perivascular cell population in the zebrafish  
1178 brain. *Elife* **6**, doi:10.7554/eLife.24369 (2017).
- 1179 31 Kuchler, A. M. *et al.* Development of the zebrafish lymphatic system requires  
1180 VEGFC signaling. *Curr Biol* **16**, 1244-1248, doi:10.1016/j.cub.2006.05.026 (2006).
- 1181 32 Hogan, B. M. & Schulte-Merker, S. How to Plumb a Pisces: Understanding Vascular  
1182 Development and Disease Using Zebrafish Embryos. *Dev Cell* **42**, 567-583,  
1183 doi:10.1016/j.devcel.2017.08.015 (2017).
- 1184 33 He, Z., Brazovskaja, A., Ebert, S., Camp, J. G. & Treutlein, B. CSS: cluster similarity  
1185 spectrum integration of single-cell genomics data. *Genome Biol* **21**, 224,  
1186 doi:10.1186/s13059-020-02147-4 (2020).
- 1187 34 Stuart, T. *et al.* Comprehensive Integration of Single-Cell Data. *Cell* **177**, 1888-1902  
1188 e1821, doi:10.1016/j.cell.2019.05.031 (2019).
- 1189 35 Becht, E. *et al.* Dimensionality reduction for visualizing single-cell data using UMAP.  
1190 *Nat Biotechnol*, doi:10.1038/nbt.4314 (2018).
- 1191 36 La Manno, G. *et al.* RNA velocity of single cells. *Nature* **560**, 494-498,  
1192 doi:10.1038/s41586-018-0414-6 (2018).
- 1193 37 Thomas, P. D. *et al.* Applications for protein sequence-function evolution data:  
1194 mRNA/protein expression analysis and coding SNP scoring tools. *Nucleic Acids Res*  
1195 **34**, W645-650, doi:10.1093/nar/gkl229 (2006).
- 1196 38 Wigle, J. T. *et al.* An essential role for Prox1 in the induction of the lymphatic  
1197 endothelial cell phenotype. *EMBO J* **21**, 1505-1513, doi:10.1093/emboj/21.7.1505  
1198 (2002).
- 1199 39 Kang, J. *et al.* An exquisite cross-control mechanism among endothelial cell fate  
1200 regulators directs the plasticity and heterogeneity of lymphatic endothelial cells.  
1201 *Blood* **116**, 140-150, doi:10.1182/blood-2009-11-252270 (2010).

- 1202 40 Bessa, J. *et al.* Zebrafish enhancer detection (ZED) vector: a new tool to facilitate  
1203 transgenesis and the functional analysis of cis-regulatory regions in zebrafish. *Dev*  
1204 *Dyn* **238**, 2409-2417, doi:10.1002/dvdy.22051 (2009).
- 1205 41 Heinz, S. *et al.* Simple combinations of lineage-determining transcription factors  
1206 prime cis-regulatory elements required for macrophage and B cell identities. *Mol Cell*  
1207 **38**, 576-589, doi:10.1016/j.molcel.2010.05.004 (2010).
- 1208 42 Rouillard, A. D. *et al.* The harmonizome: a collection of processed datasets gathered  
1209 to serve and mine knowledge about genes and proteins. *Database (Oxford)* **2016**,  
1210 doi:10.1093/database/baw100 (2016).
- 1211 43 Kulkarni, R. M., Greenberg, J. M. & Akesson, A. L. NFATc1 regulates lymphatic  
1212 endothelial development. *Mech Dev* **126**, 350-365, doi:10.1016/j.mod.2009.02.003  
1213 (2009).
- 1214 44 Norrmen, C. *et al.* FOXC2 controls formation and maturation of lymphatic collecting  
1215 vessels through cooperation with NFATc1. *J Cell Biol* **185**, 439-457,  
1216 doi:10.1083/jcb.200901104 (2009).
- 1217 45 Dieterich, L. C. *et al.* DeepCAGE Transcriptomics Reveal an Important Role of the  
1218 Transcription Factor MAFB in the Lymphatic Endothelium. *Cell Rep* **13**, 1493-1504,  
1219 doi:10.1016/j.celrep.2015.10.002 (2015).
- 1220 46 Koltowska, K. *et al.* mafba is a downstream transcriptional effector of Vegfc  
1221 signaling essential for embryonic lymphangiogenesis in zebrafish. *Genes Dev* **29**,  
1222 1618-1630, doi:10.1101/gad.263210.115 (2015).
- 1223 47 Chen, L. *et al.* Tbx1 regulates Vegfr3 and is required for lymphatic vessel  
1224 development. *J Cell Biol* **189**, 417-424, doi:10.1083/jcb.200912037 (2010).
- 1225 48 Nicenboim, J. *et al.* Lymphatic vessels arise from specialized angioblasts within a  
1226 venous niche. *Nature* **522**, 56-61, doi:10.1038/nature14425 (2015).
- 1227 49 Cha, B. *et al.* Complementary Wnt Sources Regulate Lymphatic Vascular  
1228 Development via PROX1-Dependent Wnt/beta-Catenin Signaling. *Cell Rep* **25**, 571-  
1229 584 e575, doi:10.1016/j.celrep.2018.09.049 (2018).
- 1230 50 Szklarczyk, D. *et al.* The STRING database in 2017: quality-controlled protein-  
1231 protein association networks, made broadly accessible. *Nucleic Acids Res* **45**, D362-  
1232 D368, doi:10.1093/nar/gkw937 (2017).
- 1233 51 Armour, S. M. *et al.* An HDAC3-PROX1 corepressor module acts on HNF4alpha to  
1234 control hepatic triglycerides. *Nat Commun* **8**, 549, doi:10.1038/s41467-017-00772-5  
1235 (2017).
- 1236 52 Liu, X. *et al.* Mitotic Implantation of the Transcription Factor Prospero via Phase  
1237 Separation Drives Terminal Neuronal Differentiation. *Dev Cell* **52**, 277-293 e278,  
1238 doi:10.1016/j.devcel.2019.11.019 (2020).
- 1239 53 Qin, J. *et al.* Prospero-related homeobox (Prox1) is a corepressor of human liver  
1240 receptor homolog-1 and suppresses the transcription of the cholesterol 7-alpha-  
1241 hydroxylase gene. *Mol Endocrinol* **18**, 2424-2439, doi:10.1210/me.2004-0009 (2004).
- 1242 54 Song, K. H., Li, T. & Chiang, J. Y. A Prospero-related homeodomain protein is a  
1243 novel co-regulator of hepatocyte nuclear factor 4alpha that regulates the cholesterol  
1244 7alpha-hydroxylase gene. *J Biol Chem* **281**, 10081-10088,  
1245 doi:10.1074/jbc.M513420200 (2006).
- 1246 55 Takeda, Y. & Jetten, A. M. Prospero-related homeobox 1 (Prox1) functions as a novel  
1247 modulator of retinoic acid-related orphan receptors alpha- and gamma-mediated  
1248 transactivation. *Nucleic Acids Res* **41**, 6992-7008, doi:10.1093/nar/gkt447 (2013).
- 1249 56 Lawson, N. D. & Weinstein, B. M. In vivo imaging of embryonic vascular  
1250 development using transgenic zebrafish. *Dev Biol* **248**, 307-318,  
1251 doi:10.1006/dbio.2002.0711 (2002).

- 1252 57 Ciruna, B. *et al.* Production of maternal-zygotic mutant zebrafish by germ-line  
1253 replacement. *Proc Natl Acad Sci U S A* **99**, 14919-14924,  
1254 doi:10.1073/pnas.222459999 (2002).
- 1255 58 Westerfield, M. *The Zebrafish Book. A Guide for the Laboratory use of Zebrafish*  
1256 (*Danio rerio*). 4 edn, (University of Oregon Press, 2000).
- 1257 59 Bussmann, J. & Schulte-Merker, S. Rapid BAC selection for tol2-mediated  
1258 transgenesis in zebrafish. *Development* **138**, 4327-4332, doi:10.1242/dev.068080  
1259 (2011).
- 1260 60 Okuda, K. S., Baek, S. & Hogan, B. M. Visualization and Tools for Analysis of  
1261 Zebrafish Lymphatic Development. *Methods Mol Biol* **1846**, 55-70, doi:10.1007/978-  
1262 1-4939-8712-2\_4 (2018).
- 1263 61 Bower, N. I. *et al.* Vegfd modulates both angiogenesis and lymphangiogenesis during  
1264 zebrafish embryonic development. *Development* **144**, 507-518,  
1265 doi:10.1242/dev.146969 (2017).
- 1266 62 Kartopawiro, J. *et al.* Arap3 is dysregulated in a mouse model of hypotrichosis-  
1267 lymphedema-telangiectasia and regulates lymphatic vascular development. *Hum Mol*  
1268 *Genet* **23**, 1286-1297, doi:10.1093/hmg/ddt518 (2014).
- 1269 63 Zheng, G. X. *et al.* Massively parallel digital transcriptional profiling of single cells.  
1270 *Nat Commun* **8**, 14049, doi:10.1038/ncomms14049 (2017).
- 1271 64 Wolock, S. L., Lopez, R. & Klein, A. M. Scrublet: Computational Identification of  
1272 Cell Doublets in Single-Cell Transcriptomic Data. *Cell Syst* **8**, 281-291 e289,  
1273 doi:10.1016/j.cels.2018.11.005 (2019).
- 1274 65 Butler, A., Hoffman, P., Smibert, P., Papalexi, E. & Satija, R. Integrating single-cell  
1275 transcriptomic data across different conditions, technologies, and species. *Nat*  
1276 *Biotechnol* **36**, 411-420, doi:10.1038/nbt.4096 (2018).
- 1277 66 McCarthy, D. J., Campbell, K. R., Lun, A. T. & Wills, Q. F. Scater: pre-processing,  
1278 quality control, normalization and visualization of single-cell RNA-seq data in R.  
1279 *Bioinformatics* **33**, 1179-1186, doi:10.1093/bioinformatics/btw777 (2017).
- 1280 67 Zappia, L. & Oshlack, A. Clustering trees: a visualization for evaluating clusterings at  
1281 multiple resolutions. *Gigascience* **7**, doi:10.1093/gigascience/giy083 (2018).
- 1282 68 Kejie Li, Z. O., Dongdong Lin, Michael Mingueneau, Will Chen, David Sexton,  
1283 Baohong Zhang. cellxgene VIP unleashes full power of interactive visualization,  
1284 plotting and analysis of scRNA-seq data in the scale of millions of cells. *bioRxiv*  
1285 **2020.08.28.270652**, doi:<https://doi.org/10.1101/2020.08.28.270652> (2020).
- 1286 69 Smedley, D. *et al.* The BioMart community portal: an innovative alternative to large,  
1287 centralized data repositories. *Nucleic Acids Res* **43**, W589-598,  
1288 doi:10.1093/nar/gkv350 (2015).
- 1289 70 Shannon, P. *et al.* Cytoscape: a software environment for integrated models of  
1290 biomolecular interaction networks. *Genome Res* **13**, 2498-2504,  
1291 doi:10.1101/gr.1239303 (2003).

1293

1294
